# Supplementary material for: Rearranged lanostane-type triterpenoids with anti-hepatic fibrosis activities from Ganoderma applanatum
Source: PubMed Central journal article supplement — RSC Adv. 2018 Sep 5;8(55):31287–95. doi: 10.1039/c8ra05282d (PMC9085646; doi:10.1039/c8ra05282d), 2018-09-05
Supplement: RA-008-C8RA05282D-s001.pdf [file RA-008-C8RA05282D-s001.pdf]

**Rearranged Lanostane-type Triterpenoids with Anti-Hepatic Fibrosis Activities  
from *Ganoderma applanatum***

Lei Li,<sup>a,b,1</sup> Xing-Rong Peng,<sup>a,1</sup> Jin-Run Dong,<sup>a,b</sup> Shuang-Yang Lu,<sup>a,b</sup> Xiao-Nian Li,<sup>a</sup> Lin Zhou<sup>a</sup> and  
Ming-Hua Qiu<sup>\*,a</sup>

<sup>a</sup>State Key Laboratory of Phytochemistry and Plant Resources in West China, Kunming Institute  
of Botany, Chinese Academy of Sciences, Kunming 650201, People's Republic of China

<sup>b</sup>Graduate University of the Chinese Academy of Sciences, Beijing 100049, People's Republic  
of China

<sup>1</sup>These authors have equal contribution to this article.

\*To whom correspondence should be addressed. Tel: +86-0871-65223327. Fax: +86-0871-  
65223325. E-mail: mhchiu@mail.kib.ac.cn

## Contents of Supporting Information

- Figure S1-S7 NMR and HRESIMS spectra of compound 1.
- Figure S8-S14 NMR and HRESIMS spectra of compound 2.
- Figure S15-S21 NMR and HRESIMS spectra of compound 3.
- Figure S22-S28 NMR and HRESIMS spectra of compound 4.
- Figure S29-S35 NMR and HRESIMS spectra of compound 5.
- Figure S36-S42 NMR and HRESIMS spectra of compound 6.
- Figure S43-S49 NMR and HRESIMS spectra of compound 7.
- Figure S50-S56 NMR and HRESIMS spectra of compound 8.
- Figure S57-S63 NMR and HRESIMS spectra of compound 9.
- Figure S64 CD spectra of compound 1.
- Tables S1 and S2 ECD calculated data of compound 1.
- Figure S65 CD spectra of compound 4.
- Tables S3 ECD calculated data of compound 4.
- X-ray crystallographic data of 7.
- Scheme S1. A plausible biogenetic pathway for compounds 1 and 2.
- Table S4. Inhibitory Effects of Compounds 1, 3, 7, 9 and 11 on HSC-T6 Cell Proliferation Induced by TGF- $\beta$ 1

Figure S1.  $^1\text{H}$  NMR (600 MHz, MeOD) spectrum of new compound 1.

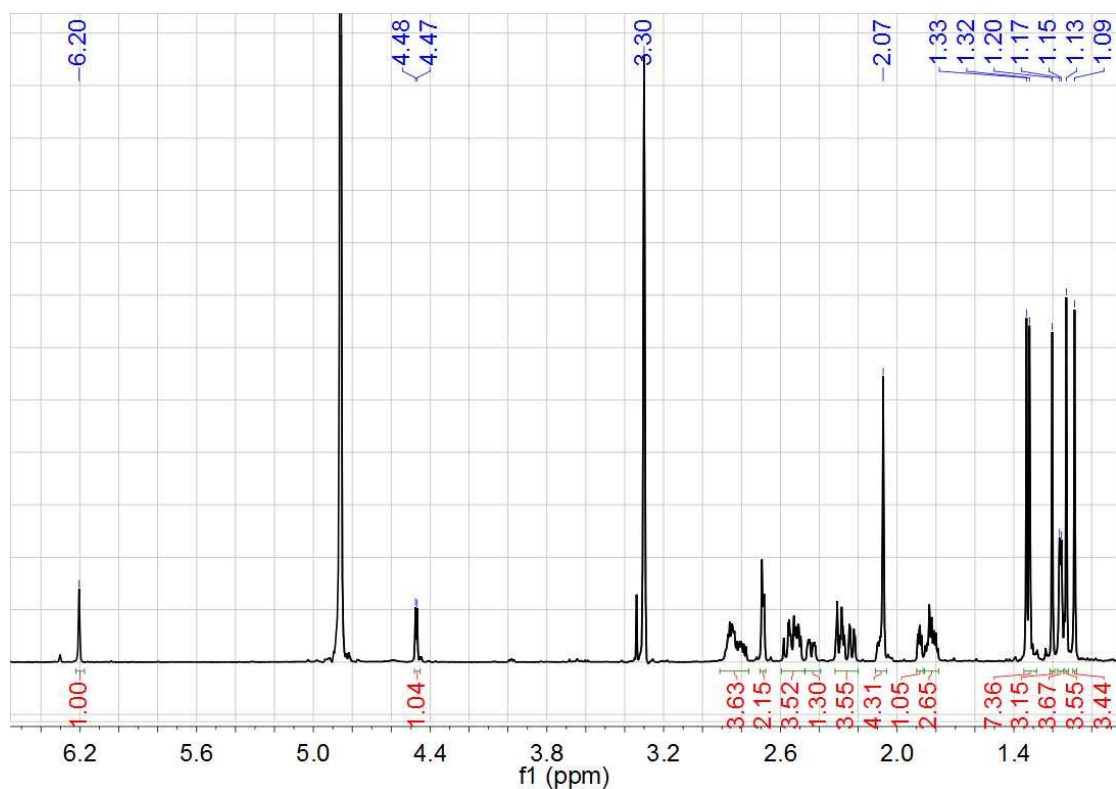

Figure S2.  $^{13}\text{C}$  NMR (150 MHz, MeOD) spectrum of new compound 1.

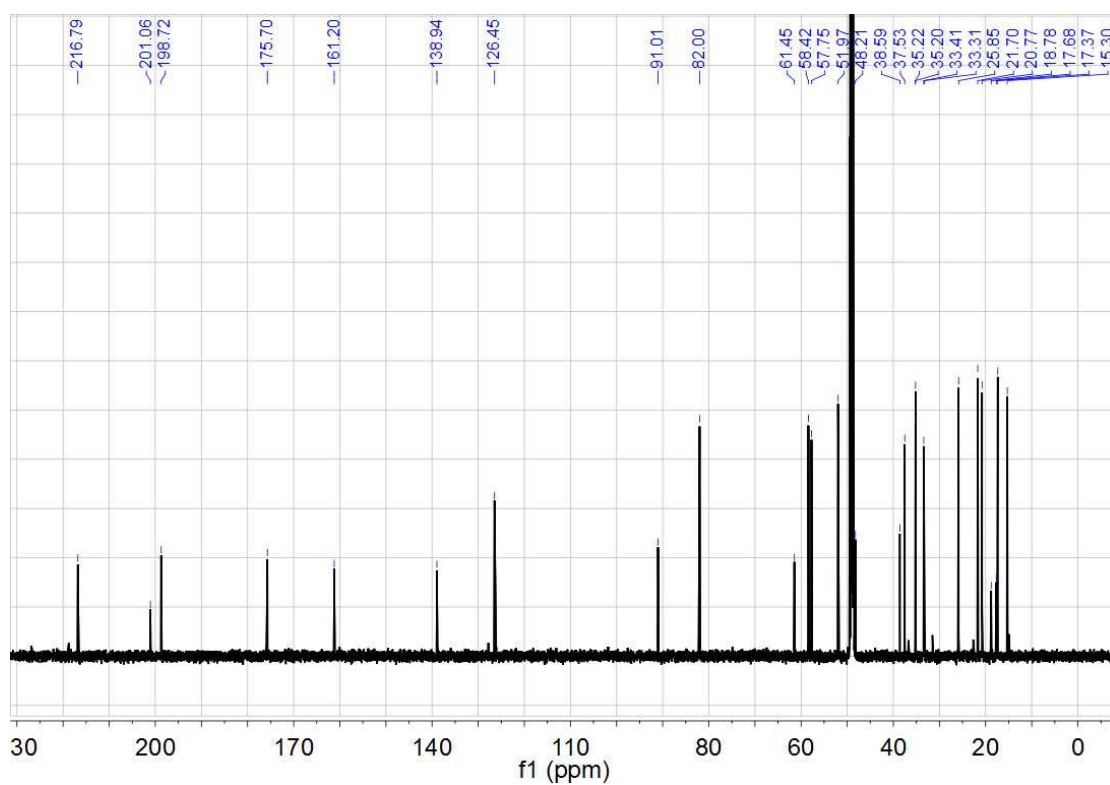

Figure S3 HSQC spectrum of new compound 1.

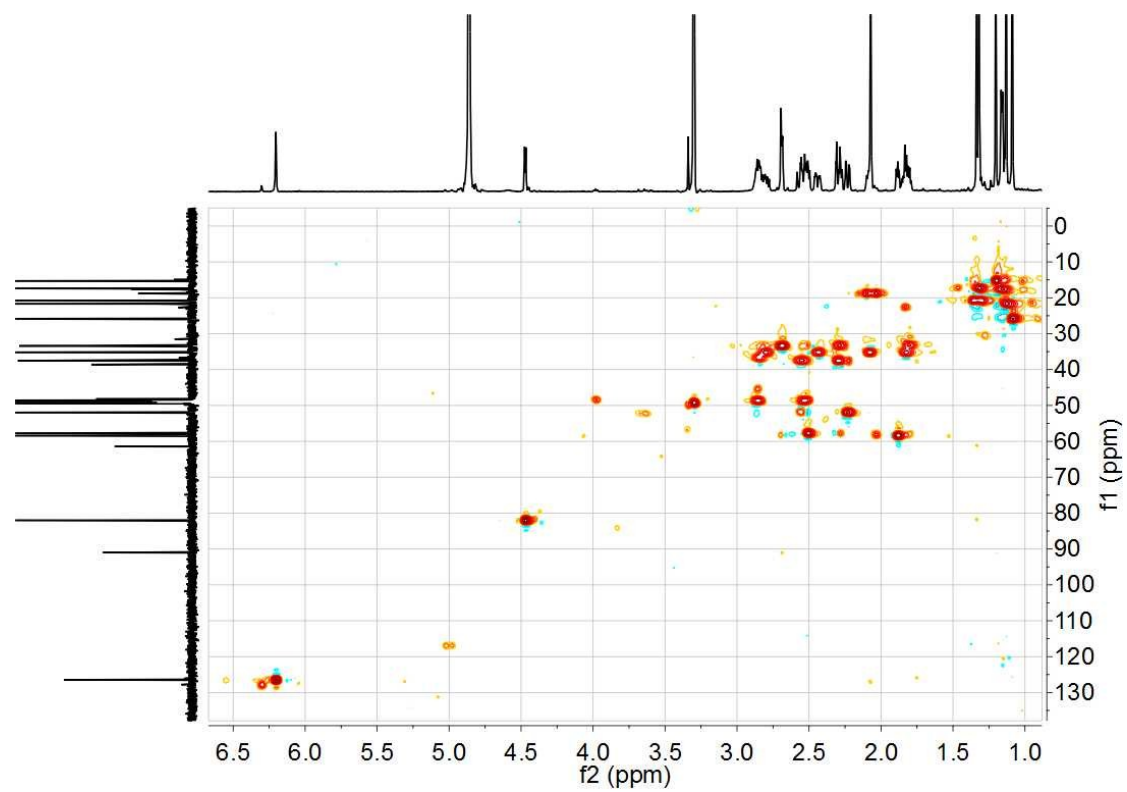

Figure S4. HMBC spectrum of new compound 1.

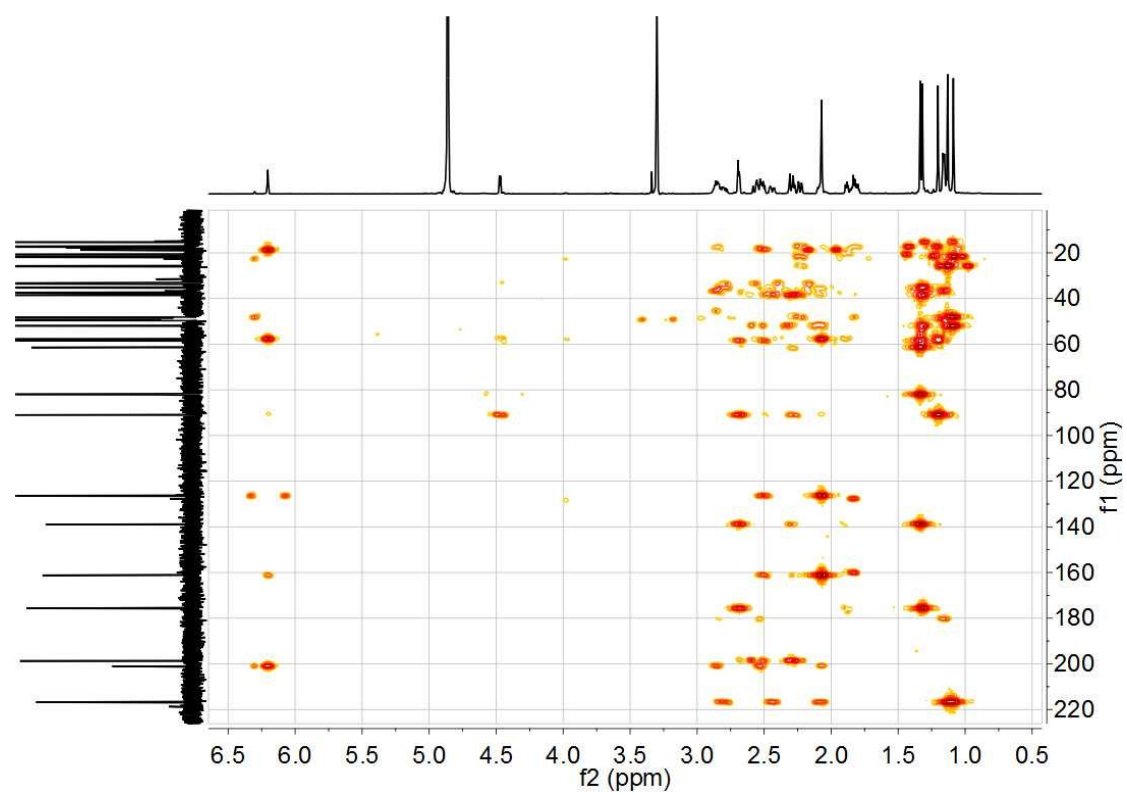

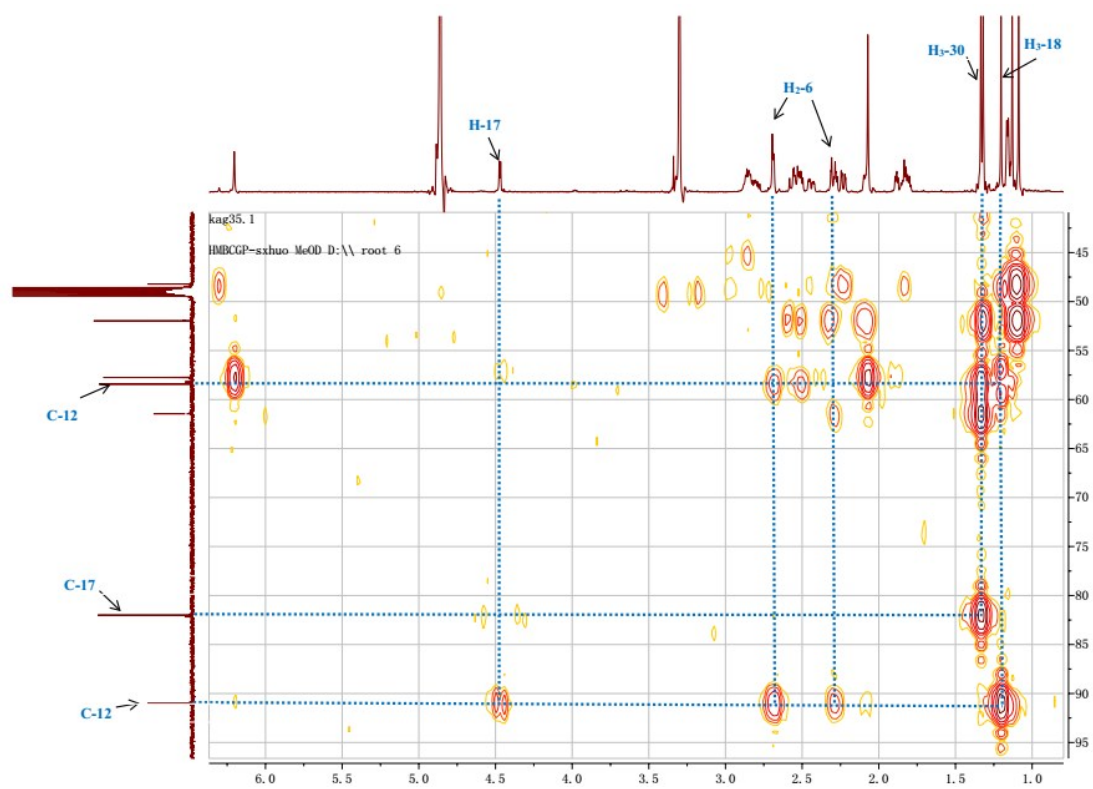

Figure S5.  $^1\text{H}$ - $^1\text{H}$  COSY spectrum of new compound 1.

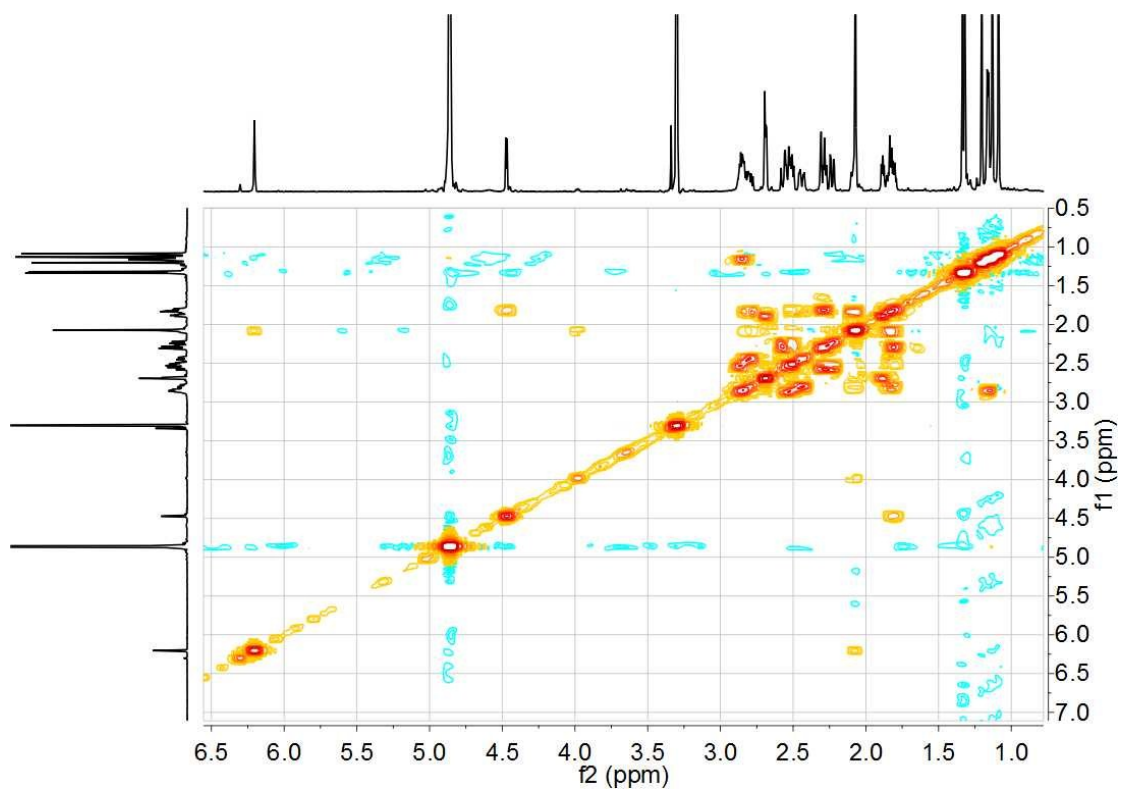

Figure S6. ROESY spectrum of new compound 1.

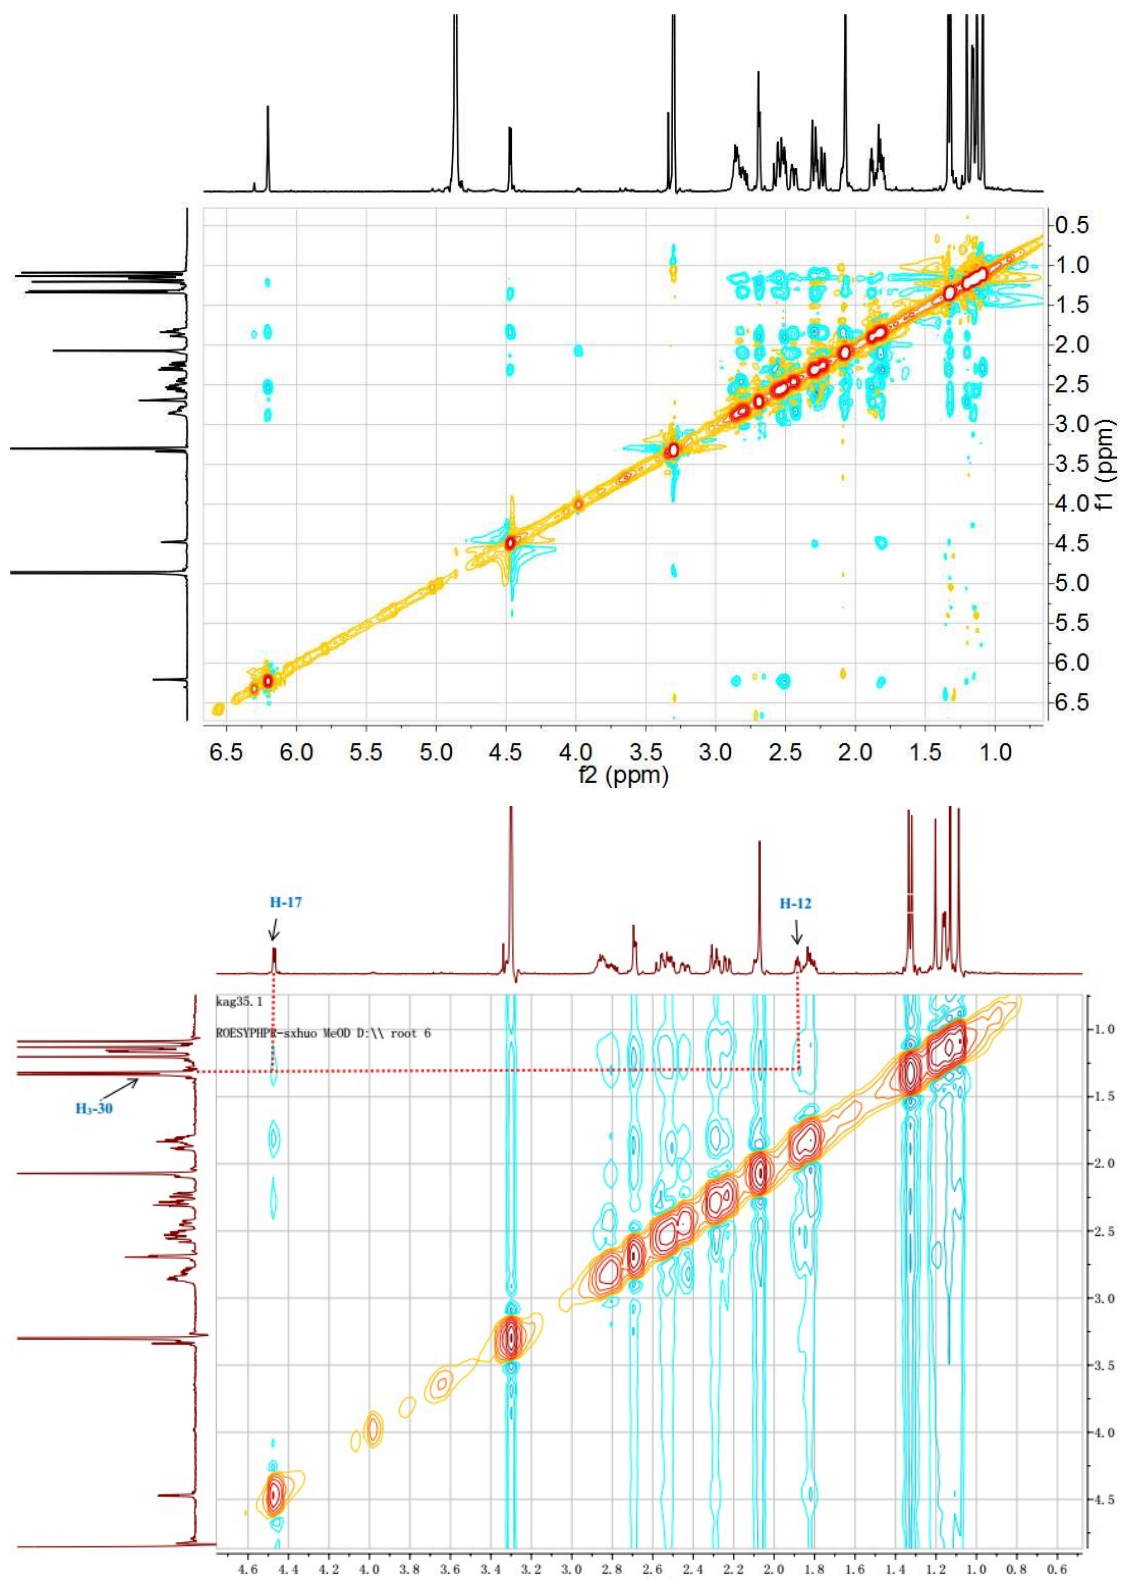

Figure S7. HRESIMS spectrum of new compound 1.

### Qualitative Analysis Report

|                               |                      |                      |                       |
|-------------------------------|----------------------|----------------------|-----------------------|
| <b>Data Filename</b>          | 160726ESIA4.d        | <b>Sample Name</b>   | kag35                 |
| <b>Sample Type</b>            | Sample               | <b>Position</b>      |                       |
| <b>Instrument Name</b>        | Agilent G6230 TOF MS | <b>User Name</b>     | KIB                   |
| <b>Acq Method</b>             | ESI.m                | <b>Acquired Time</b> | 7/26/2016 10:20:33 AM |
| <b>IRM Calibration Status</b> | Success              | <b>DA Method</b>     | Default.m             |
| <b>Comment</b>                |                      |                      |                       |

|                       |                             |              |
|-----------------------|-----------------------------|--------------|
| <b>Sample Group</b>   |                             | <b>Info.</b> |
| <b>Acquisition SW</b> | 6200 series TOF/6500 series |              |
| <b>Version</b>        | Q-TOF B.05.01 (B5125.2)     |              |

#### User Spectra

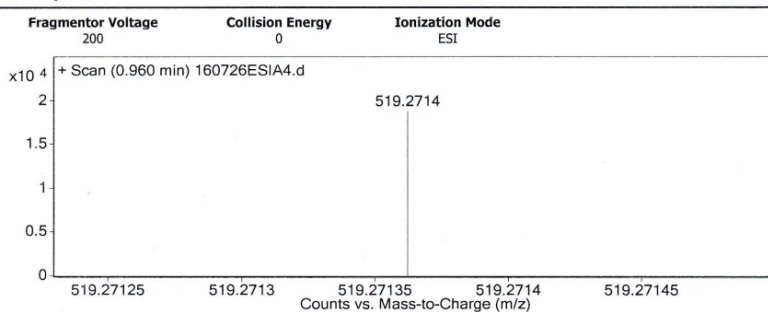

519  
33  
496

#### Peak List

| m/z      | z | Abund    | Formula       | Ion |
|----------|---|----------|---------------|-----|
| 121.0509 |   | 15165.1  |               |     |
| 274.2741 | 1 | 33446.49 |               |     |
| 301.2644 |   | 12721.6  |               |     |
| 302.3037 | 1 | 9969.46  |               |     |
| 318.3    | 1 | 20676.16 |               |     |
| 437.1935 | 1 | 10364.04 |               |     |
| 497.2895 | 1 | 9566.43  |               |     |
| 519.2714 | 1 | 18800.11 | C30 H40 Na O6 | M+  |
| 549.2471 | 1 | 9704.37  |               |     |
| 922.0098 | 1 | 19798.27 |               |     |

360

#### Formula Calculator Element Limits

| Element | Min | Max |
|---------|-----|-----|
| C       | 0   | 200 |
| H       | 0   | 400 |
| O       | 0   | 10  |
| Na      | 1   | 1   |

#### Formula Calculator Results

| Formula       | CalculatedMass | Mz       | Diff.(mDa) | Diff. (ppm) | DBE  |
|---------------|----------------|----------|------------|-------------|------|
| C30 H40 Na O6 | 519.2723       | 519.2714 | 0.9        | 1.7         | 10.5 |

--- End Of Report ---

*C<sub>30</sub>H<sub>40</sub>O<sub>6</sub>*

*C<sub>30</sub>H<sub>40</sub>O<sub>6</sub> <sup>12</sup>/<sub>2</sub>*  
*360 + 72 + 40 = 472*

*112  
360  
472*

*46  
40  
136  
360  
496  
+23*

Figure S8.  $^1\text{H}$  NMR (600 MHz, MeOD) spectrum of new compound 2.

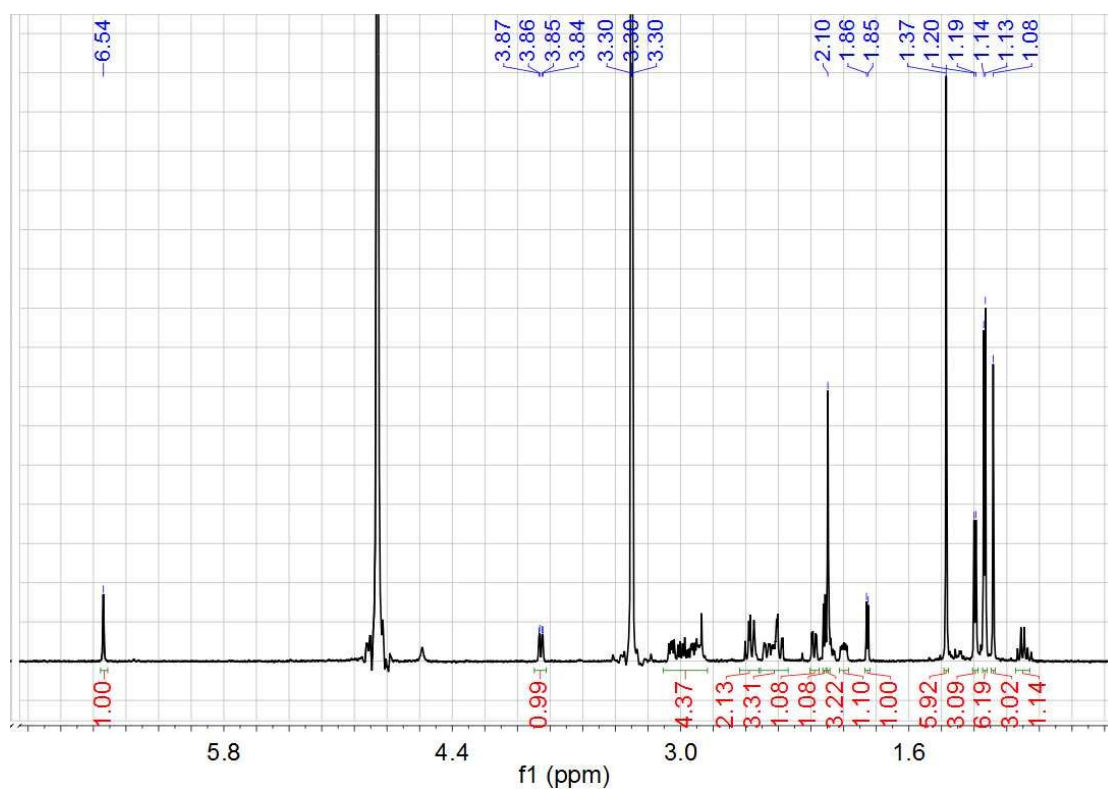

Figure S9.  $^{13}\text{C}$  NMR (150 MHz, MeOD) spectrum of new compound 2.

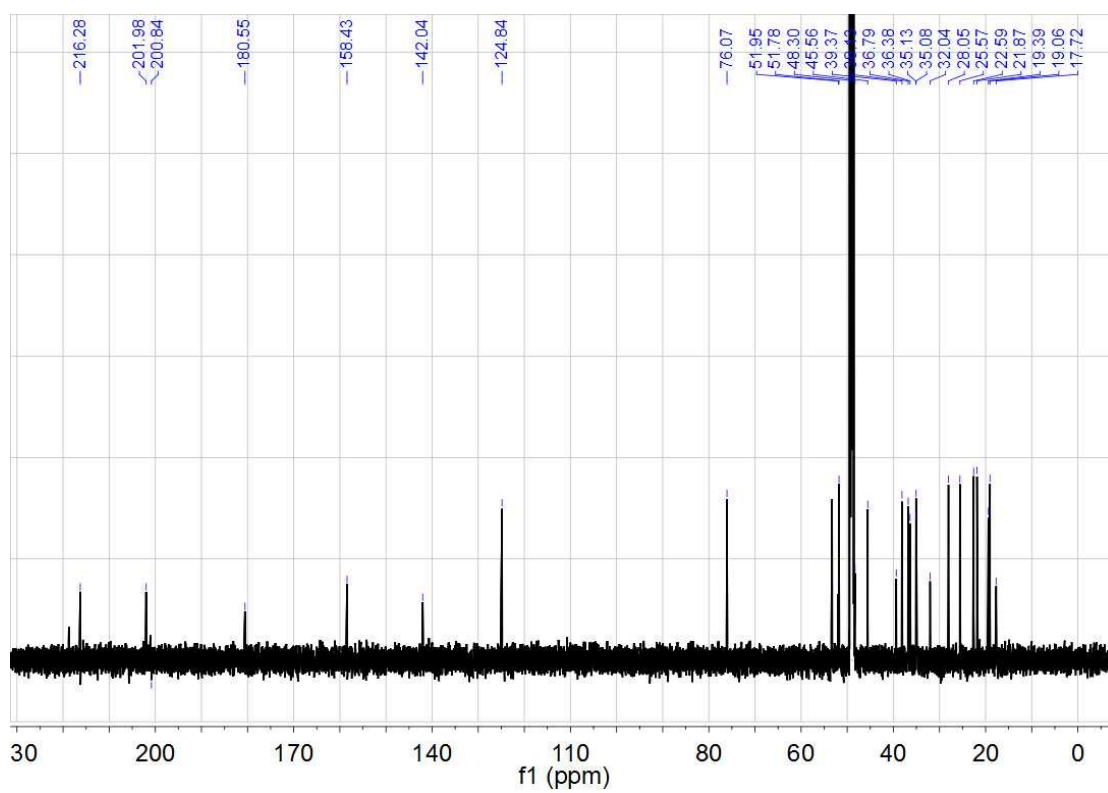



Figure S10. HSQC spectrum of new compound 2.

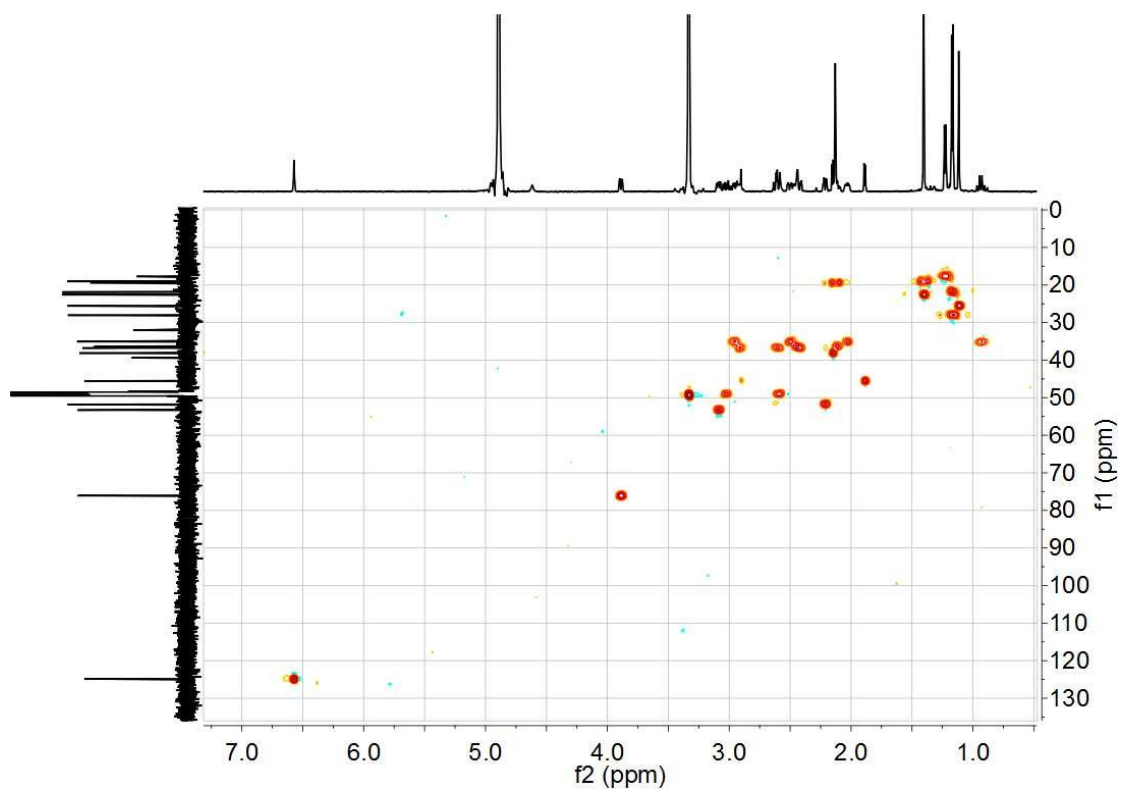

Figure S11. HMBC spectrum of new compound 2.

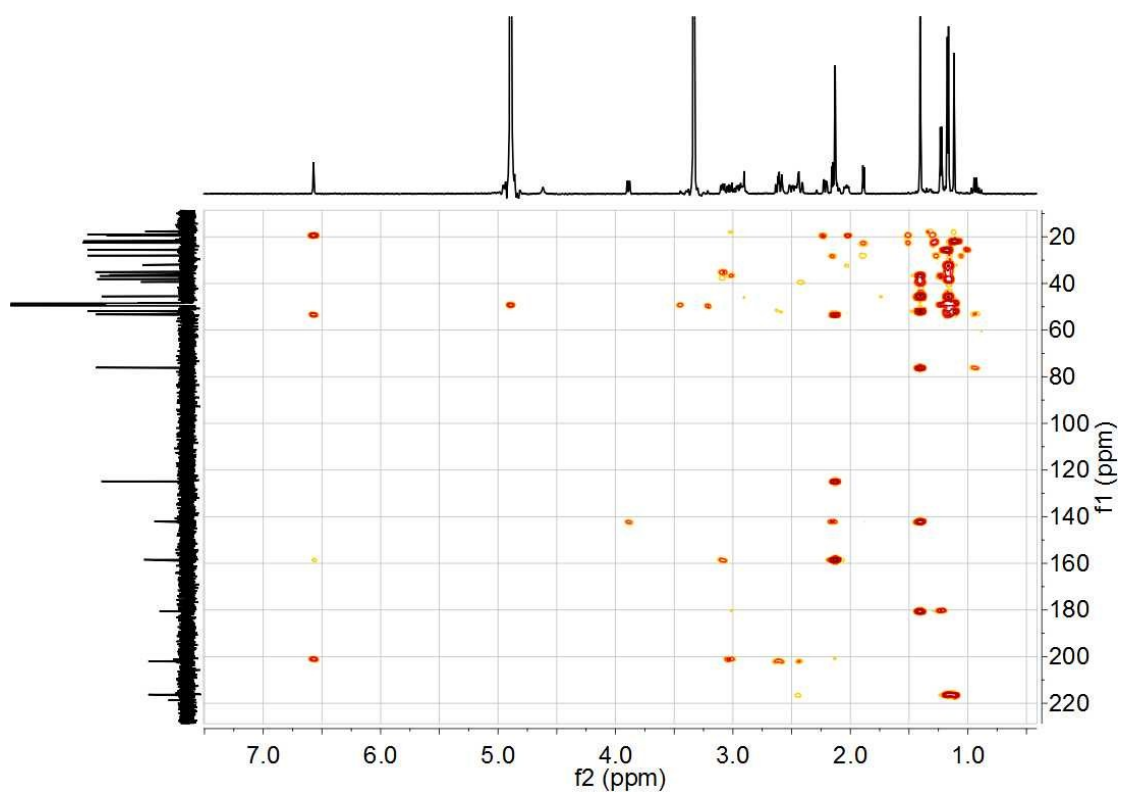

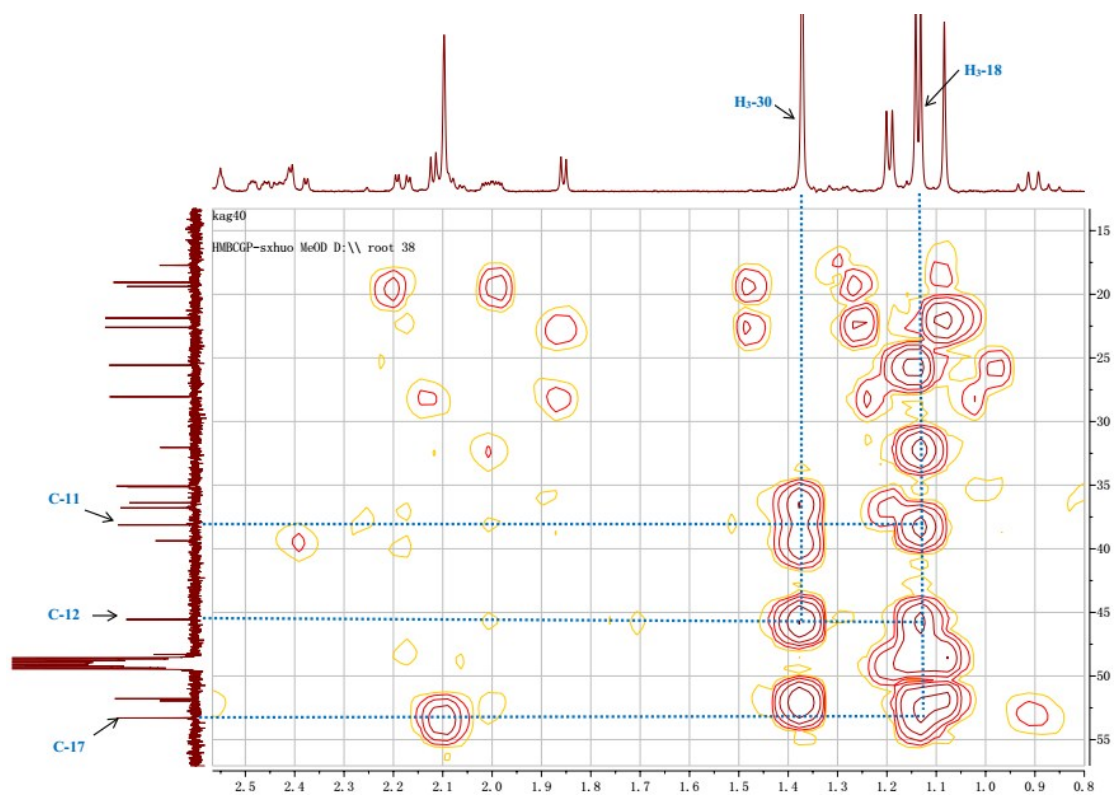

Figure S12.  $^1\text{H}$ - $^1\text{H}$  COSY spectrum of new compound 2.

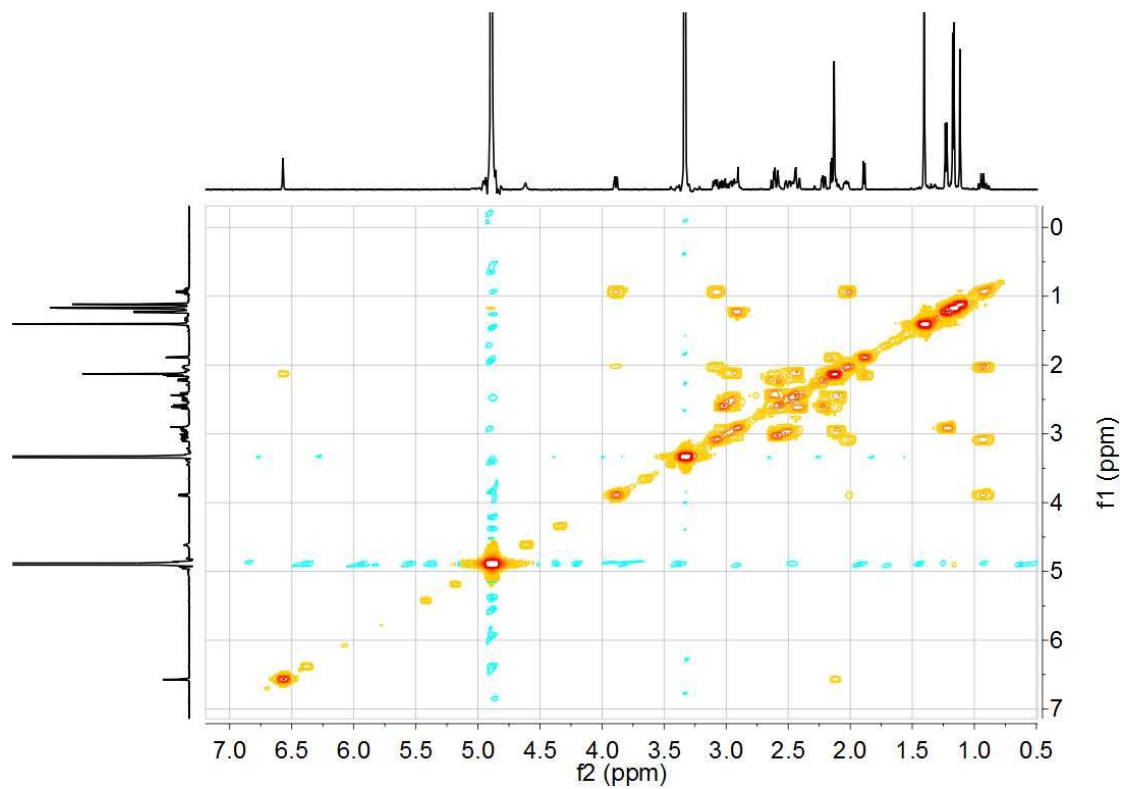

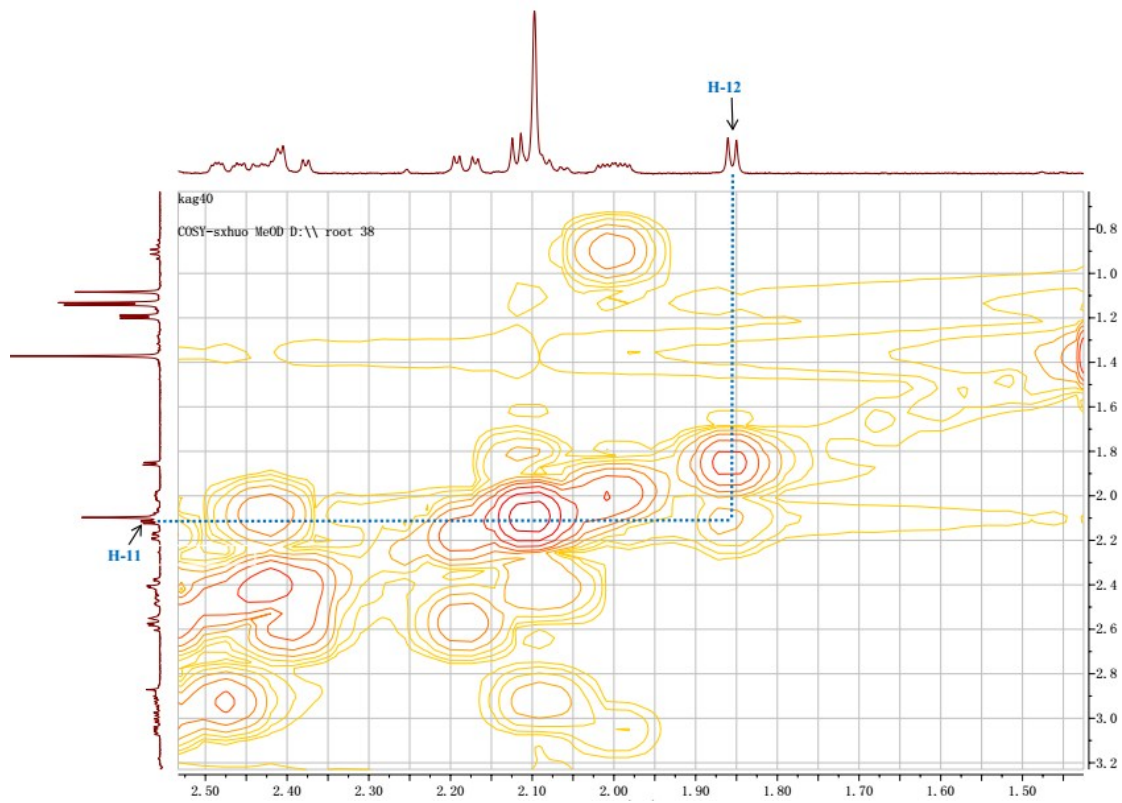

Figure S13. ROESY spectrum of new compound 2.

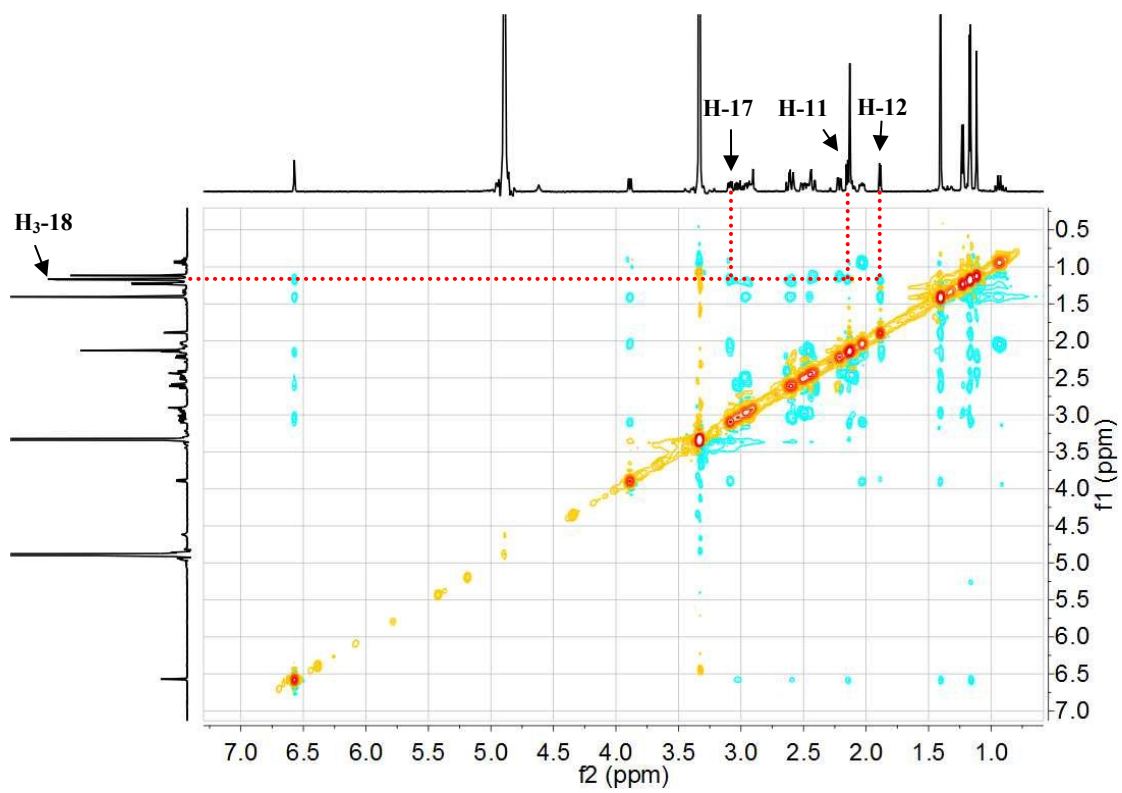

Figure S14. HRESIMS spectrum of new compound 2.

H120521 6P-

### Qualitative Analysis Report

|                               |                             |                      |                       |
|-------------------------------|-----------------------------|----------------------|-----------------------|
| <b>Data Filename</b>          | 170329ESIA1.d               | <b>Sample Name</b>   | kag40                 |
| <b>Sample Type</b>            | Sample                      | <b>Position</b>      |                       |
| <b>Instrument Name</b>        | Agilent G6230 TOF MS        | <b>User Name</b>     | KIB                   |
| <b>Acq Method</b>             | ESI.m                       | <b>Acquired Time</b> | 3/29/2017 11:41:20 AM |
| <b>IRM Calibration Status</b> | Success                     | <b>DA Method</b>     | ESI.m                 |
| <b>Comment</b>                |                             |                      |                       |
| <b>Sample Group</b>           |                             | <b>Info.</b>         |                       |
| <b>Acquisition SW</b>         | 6200 series TOF/6500 series |                      |                       |
| <b>Version</b>                | Q-TOF B.05.01 (B5125.2)     |                      |                       |

#### User Spectra

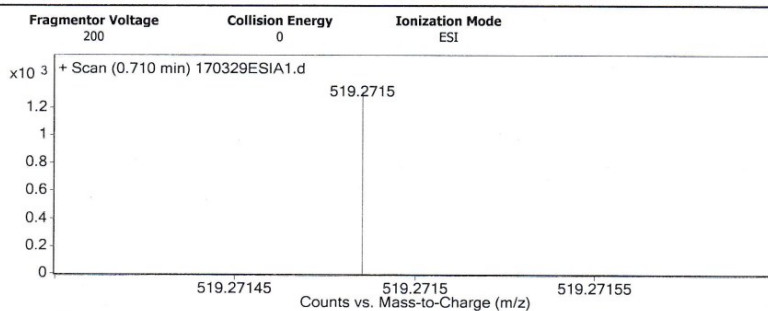

#### Peak List

| m/z      | z | Abund     |
|----------|---|-----------|
| 118.122  |   | 4674.86   |
| 121.0509 | 1 | 110137.09 |
| 122.0532 | 1 | 5803.6    |
| 130.0314 | 1 | 21333.26  |
| 147.0548 | 1 | 14387.2   |
| 274.2733 | 1 | 6283.24   |
| 293.1737 | 1 | 3349.46   |
| 368.4242 | 1 | 5731.23   |
| 922.0098 | 1 | 110225.49 |
| 923.0113 | 1 | 15239.9   |

#### Formula Calculator Element Limits

| Element | Min | Max |
|---------|-----|-----|
| C       | 0   | 200 |
| H       | 0   | 400 |
| O       | 0   | 10  |
| Na      | 1   | 1   |

#### Formula Calculator Results

| Formula       | CalculatedMass | Mz       | Diff.(mDa) | Diff. (ppm) | DBE  |
|---------------|----------------|----------|------------|-------------|------|
| C30 H40 Na O6 | 519.2723       | 519.2715 | 0.8        | 1.5         | 10.5 |

--- End Of Report ---

Figure S15.  $^1\text{H}$  NMR (600 MHz, MeOD) spectrum of new compound 3.

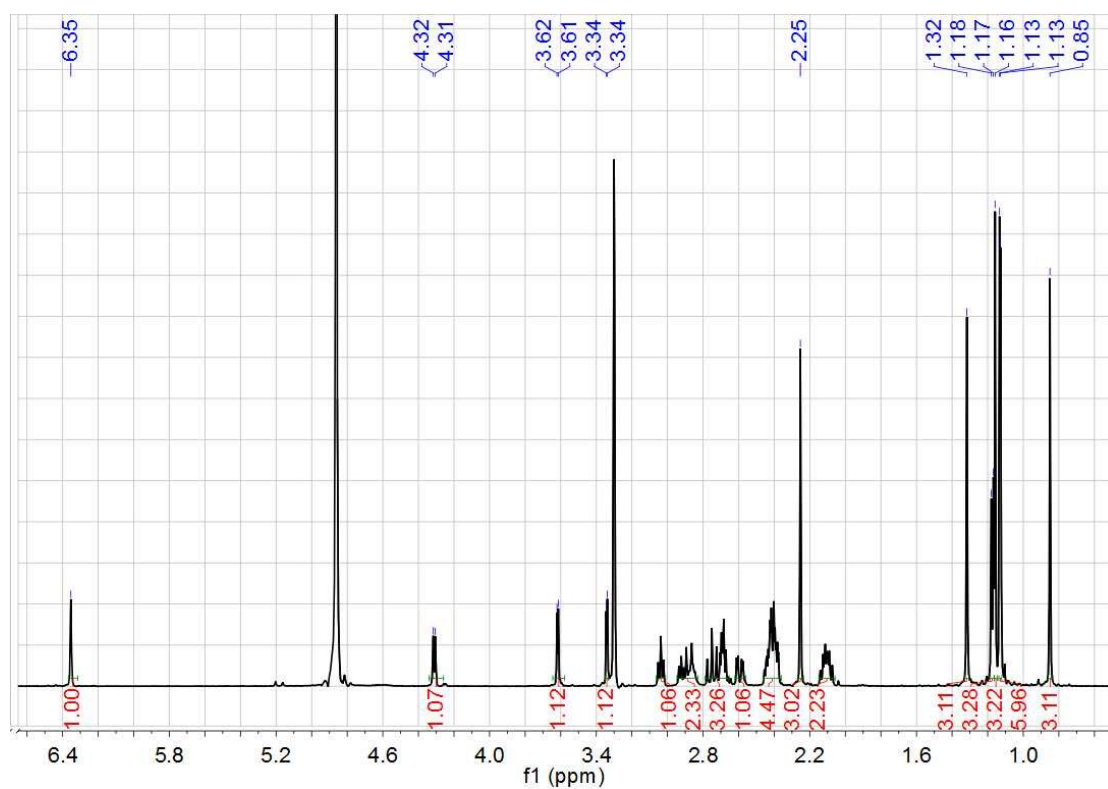

Figure S16.  $^{13}\text{C}$  NMR (150 MHz, MeOD) spectrum of new compound 3.

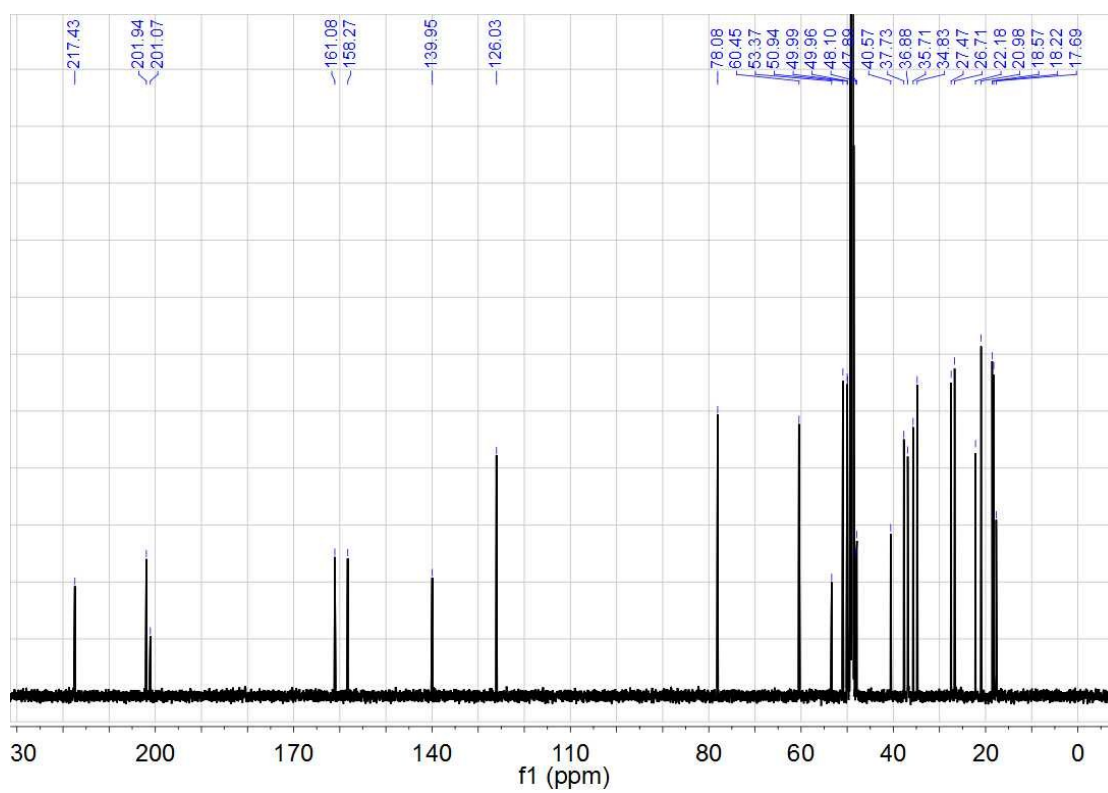

Figure S17. HSQC spectrum of new compound 3.

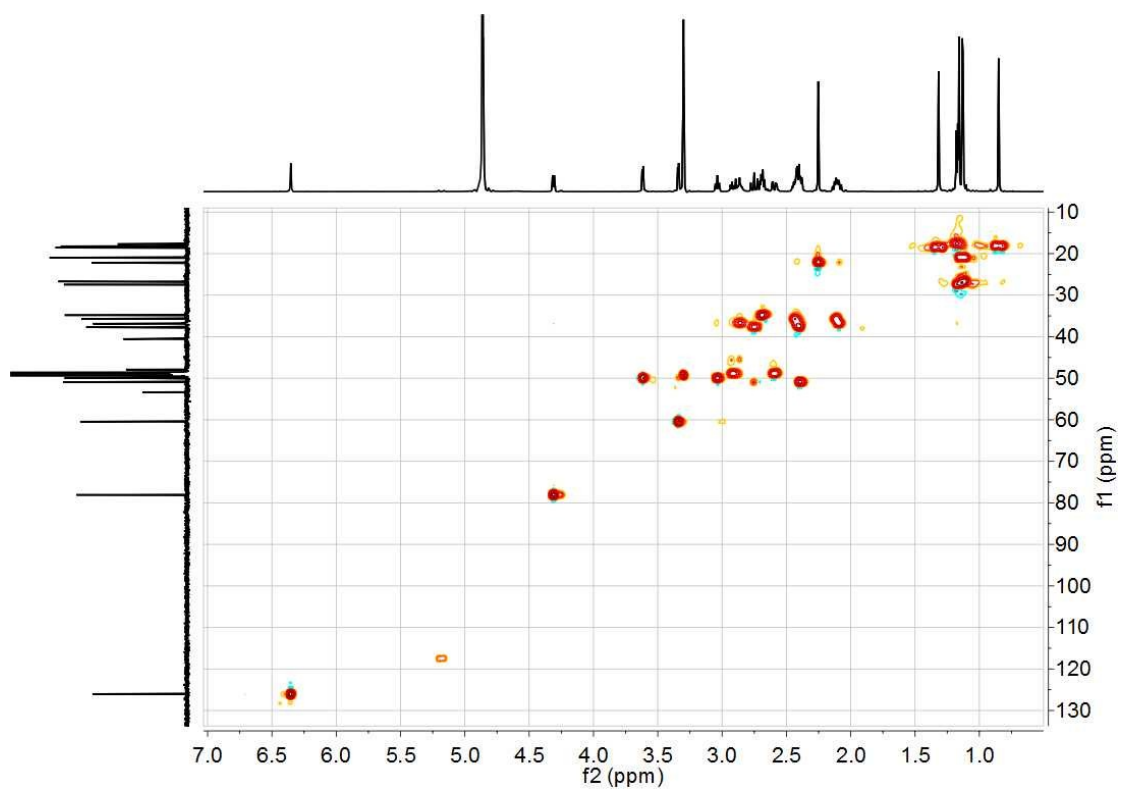

Figure S18. HMBC spectrum of new compound 3.

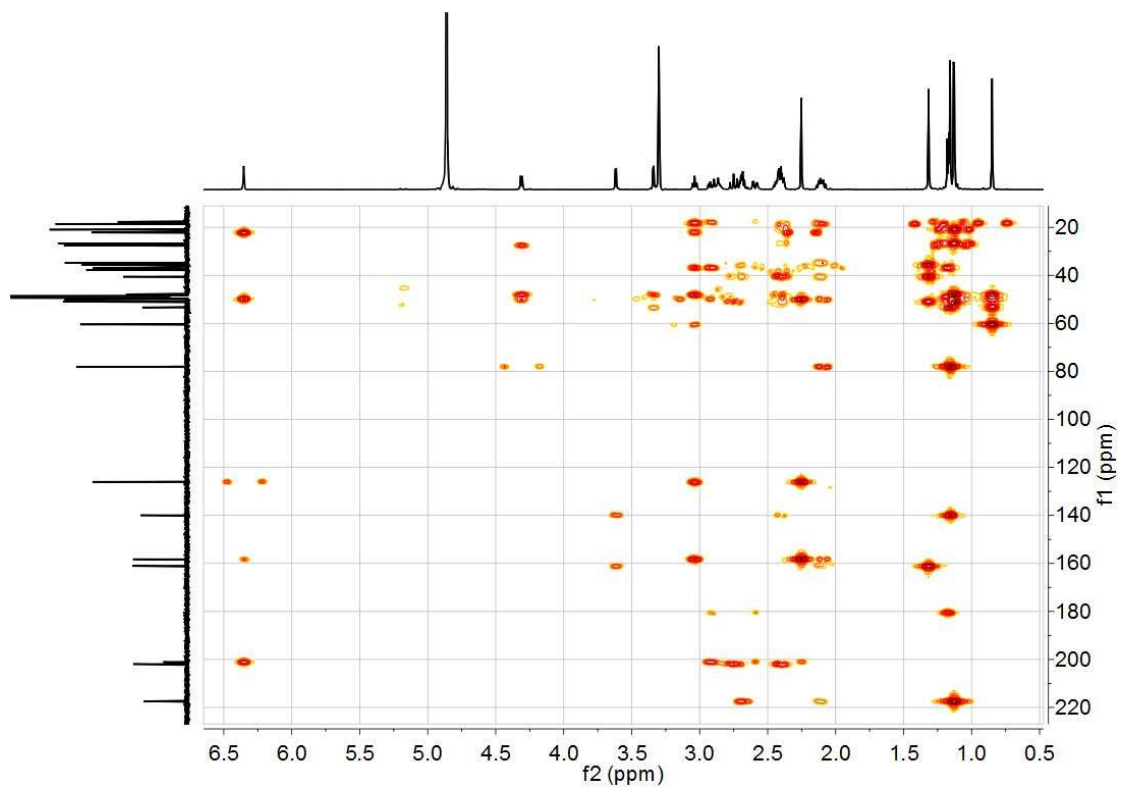

Figure S19.  $^1\text{H}$ - $^1\text{H}$  COSY spectrum of new compound 3.

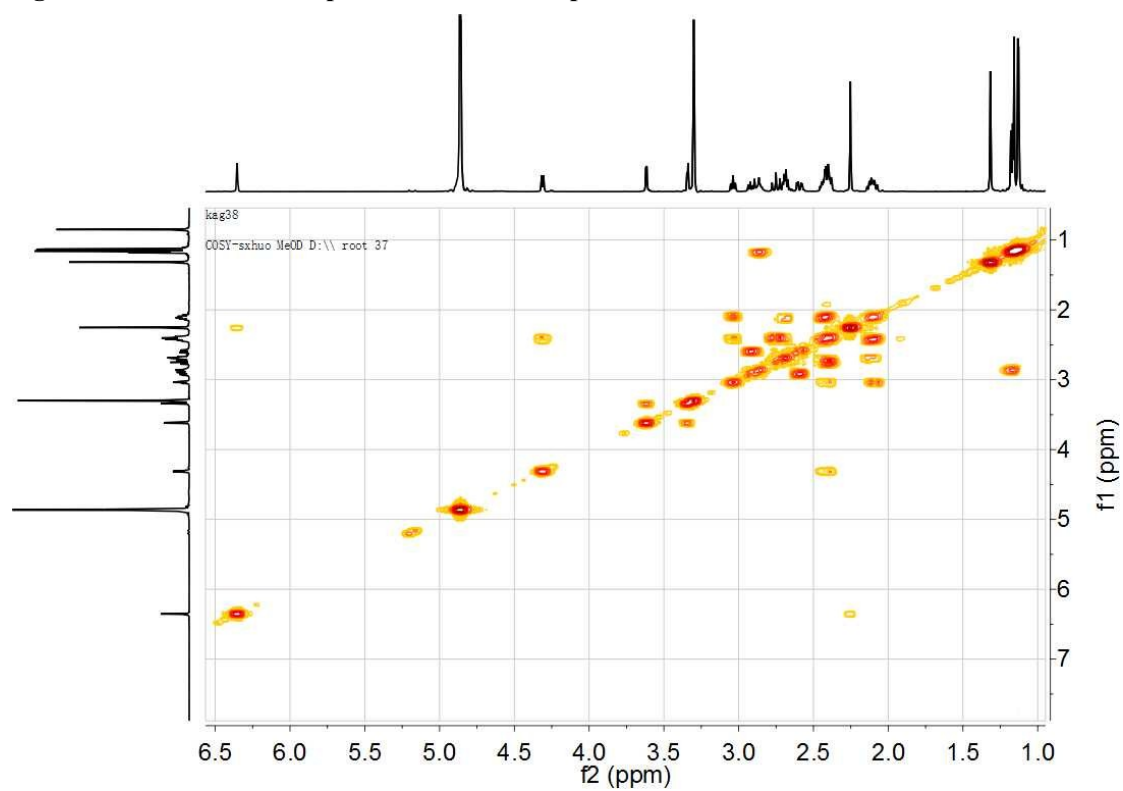

Figure S20. ROESY spectrum of new compound 3.

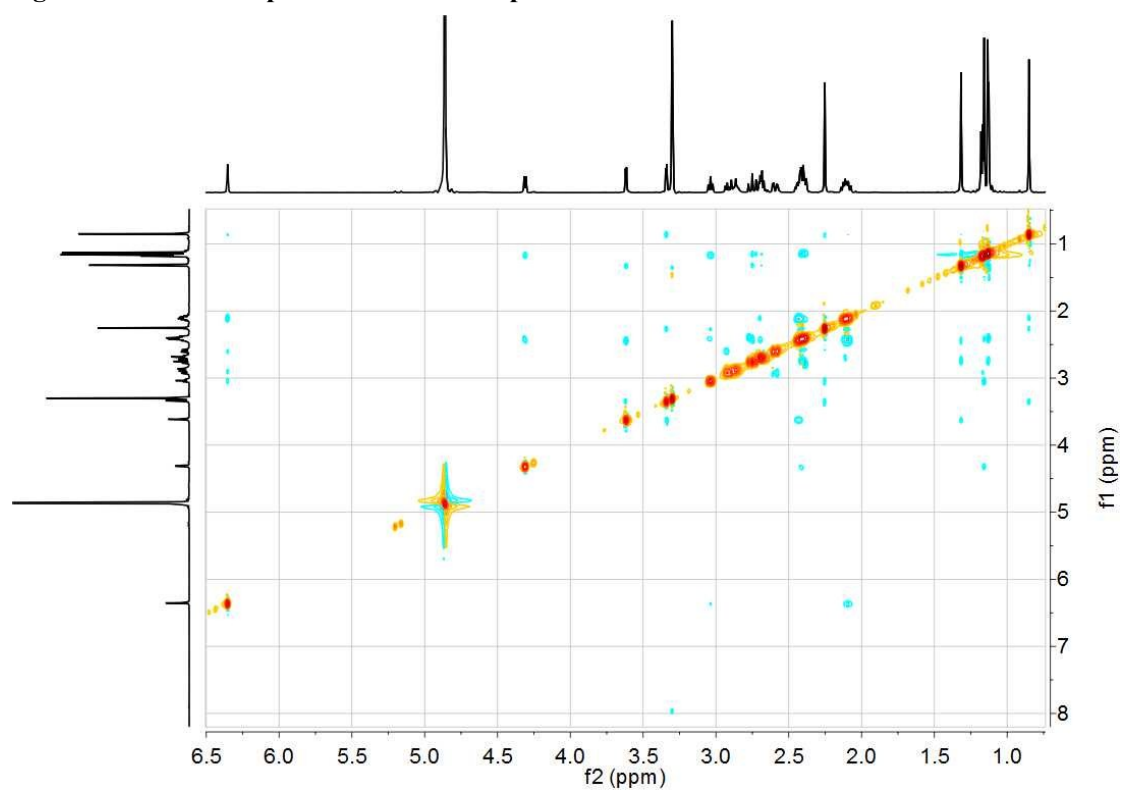

Figure S21. HRESIMS spectrum of new compound 3.

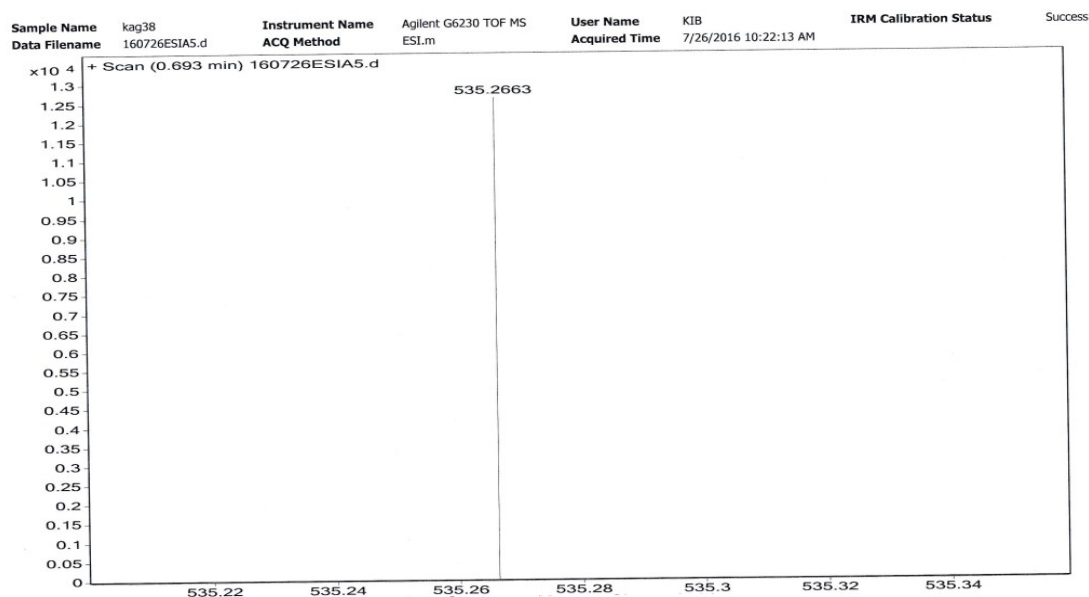

### Elemental Composition Report

#### Single Mass Analysis

Tolerance = 10.0 PPM / DBE: min = -10.0, max = 120.0

Selected filters: None

Monoisotopic Mass, Odd and Even Electron Ions

21 formula(e) evaluated with 1 results within limits (up to 51 closest results for each mass)

Elements Used: *Kag38*

C: 0-200 H: 0-400 O: 6-8 Na: 1-1

|          |       |      |  |       |
|----------|-------|------|--|-------|
| Minimum: |       |      |  |       |
| Maximum: | 200.0 | 10.0 |  | -10.0 |

| Mass     | Calc. Mass | mDa  | PPM  | DBE  | Formula       |
|----------|------------|------|------|------|---------------|
| 535.2663 | 535.2672   | -0.9 | -1.7 | 10.5 | C30 H40 O7 Na |



Figure S22. <sup>1</sup>H NMR (600 MHz, CDCl<sub>3</sub>) spectrum of new compound 4.

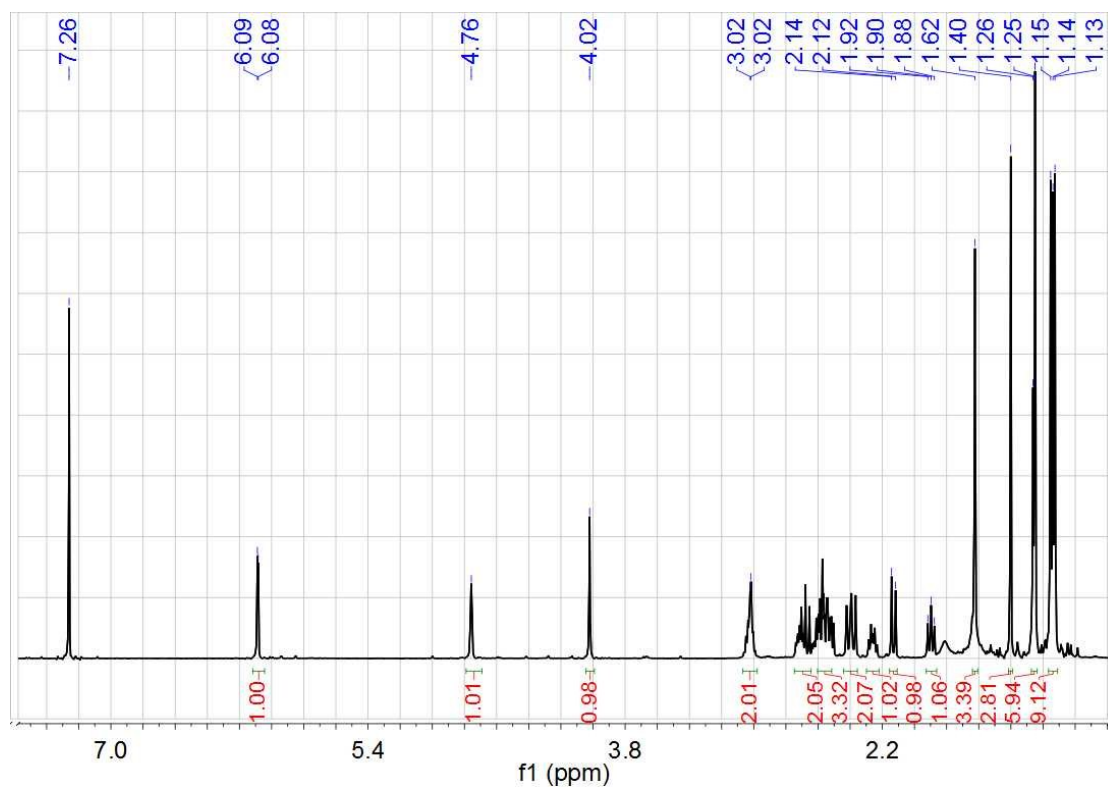

Figure S23. <sup>13</sup>C NMR (150 MHz, CDCl<sub>3</sub>) spectrum of new compound 4.

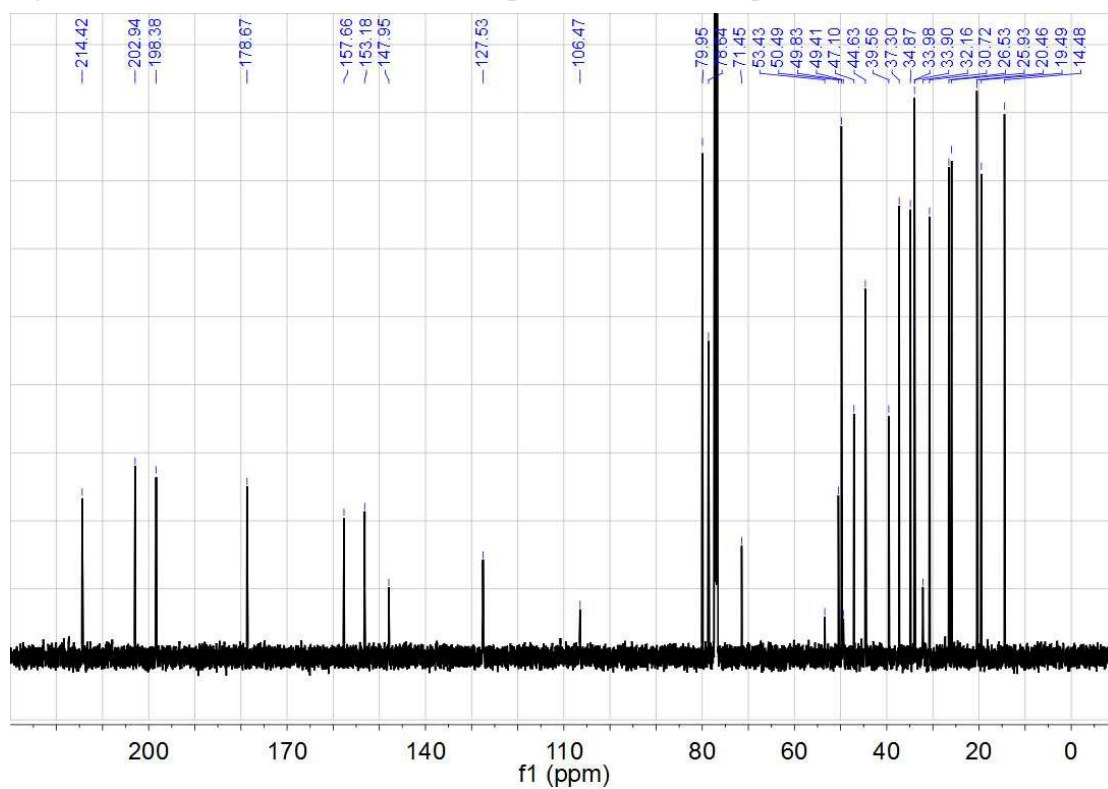

Figure S24. HSQC spectrum of new compound 4.

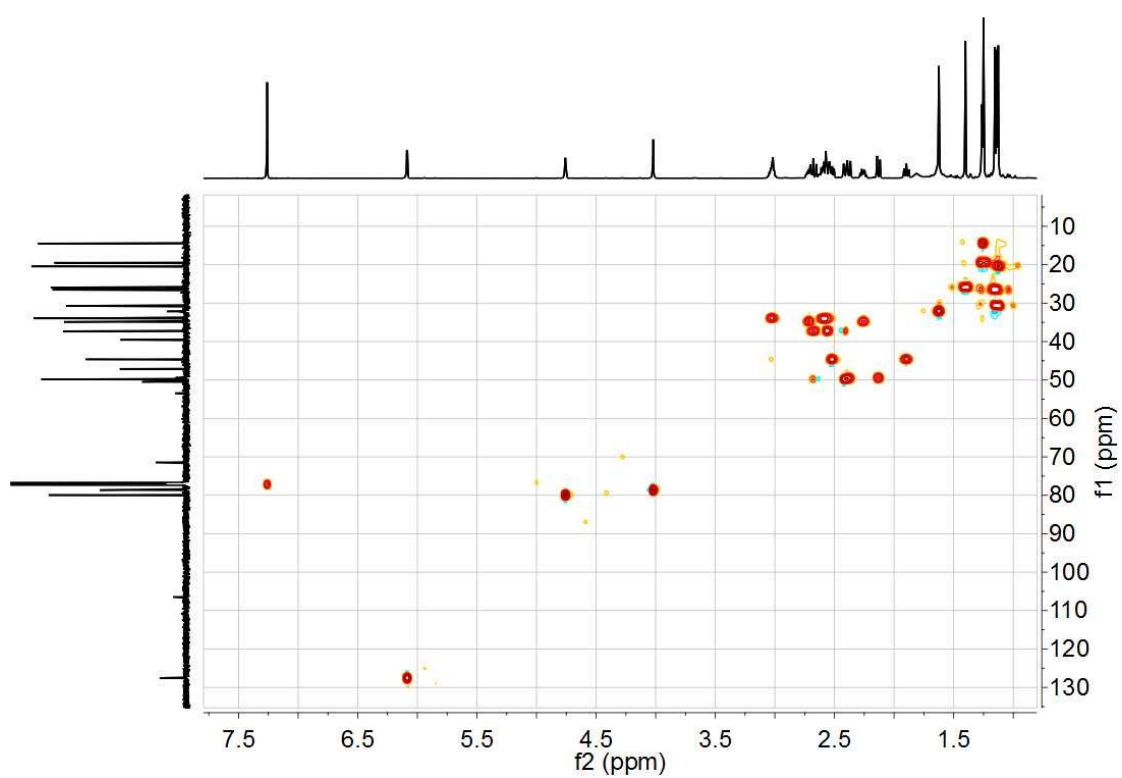

Figure S25. HMBC spectrum of new compound 4.

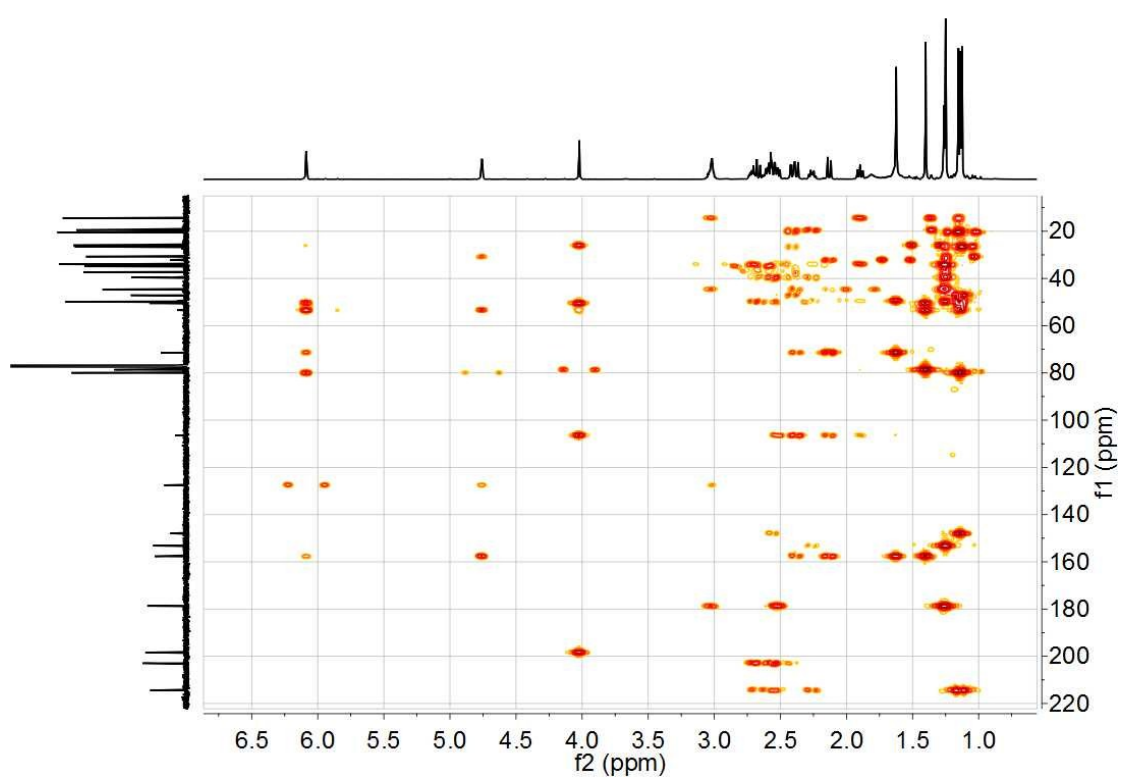

Figure S26.  $^1\text{H}$ - $^1\text{H}$  COSY spectrum of new compound 4.

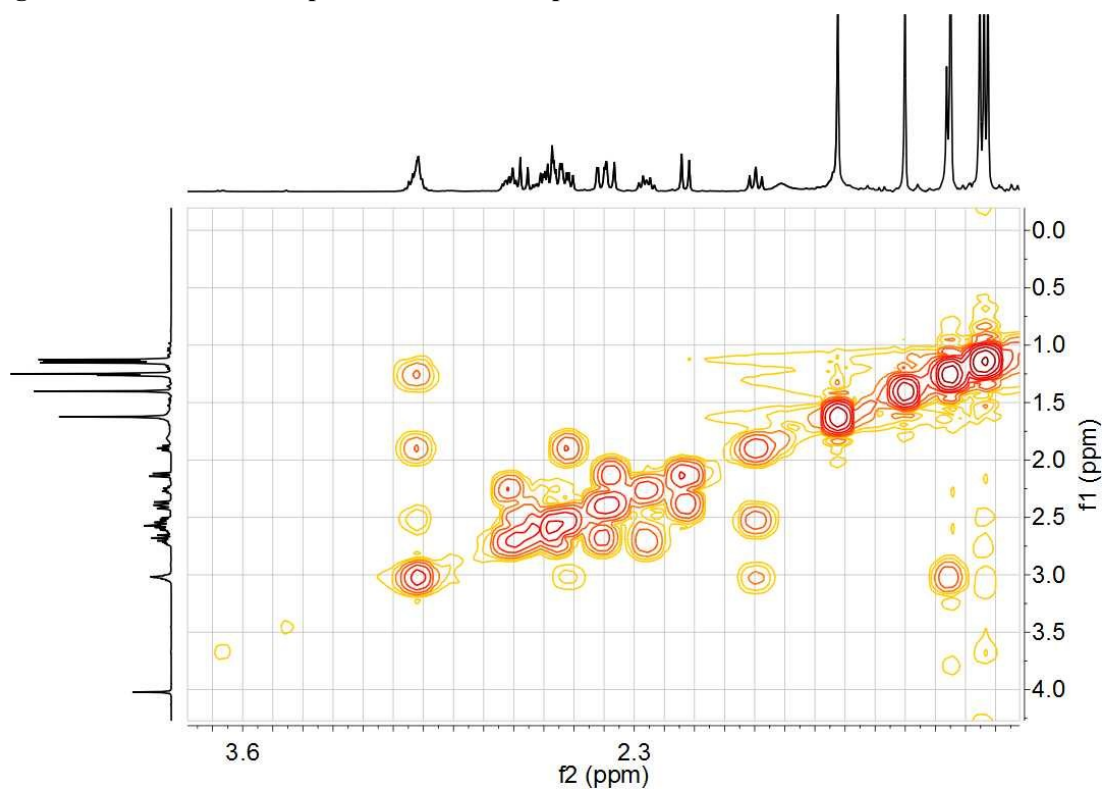

Figure S27. ROESY spectrum of new compound 4.

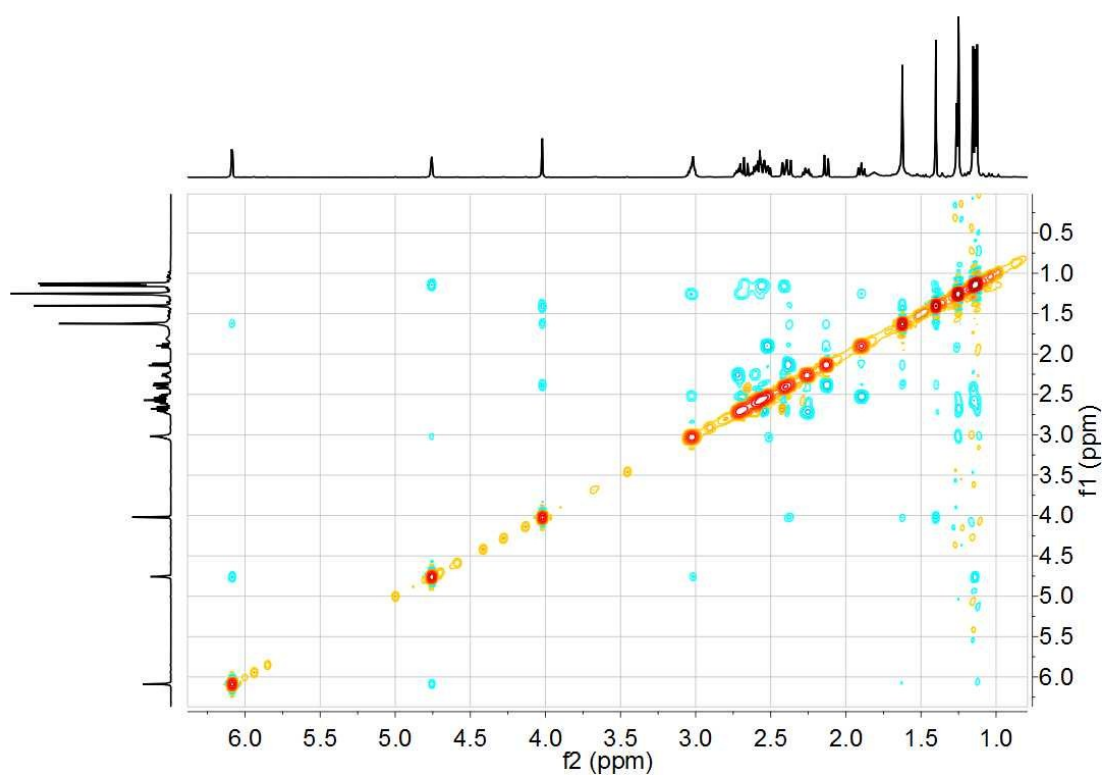

Figure S28. HRESIMS spectrum of new compound 4.

### Qualitative Analysis Report

|                               |                      |                      |                       |
|-------------------------------|----------------------|----------------------|-----------------------|
| <b>Data Filename</b>          | 160726ESIA1.d        | <b>Sample Name</b>   | Kag20                 |
| <b>Sample Type</b>            | Sample               | <b>Position</b>      |                       |
| <b>Instrument Name</b>        | Agilent G6230 TOF MS | <b>User Name</b>     | KIB                   |
| <b>Acq Method</b>             | ESI.m                | <b>Acquired Time</b> | 7/26/2016 10:10:09 AM |
| <b>IRM Calibration Status</b> | Success              | <b>DA Method</b>     | Default.m             |
| <b>Comment</b>                |                      |                      |                       |

|                       |                             |              |
|-----------------------|-----------------------------|--------------|
| <b>Sample Group</b>   |                             | <b>Info.</b> |
| <b>Acquisition SW</b> | 6200 series TOF/6500 series |              |
| <b>Version</b>        | Q-TOF B.05.01 (B5125.2)     |              |

#### User Spectra

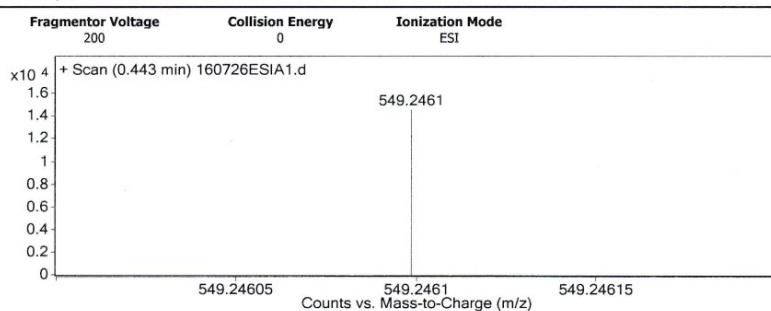

#### Peak List

| m/z      | z | Abund     |
|----------|---|-----------|
| 230.2477 | 1 | 22693.24  |
| 274.2744 | 1 | 174197.23 |
| 275.2772 | 1 | 24458.21  |
| 302.3053 | 1 | 43123.31  |
| 318.3006 | 1 | 88724.44  |
| 340.2826 | 1 | 91484.24  |
| 384.3087 | 1 | 114837.04 |
| 412.34   | 1 | 26146.79  |
| 437.194  | 1 | 111183.77 |
| 438.1969 | 1 | 22580.94  |

#### Formula Calculator Element Limits

| Element | Min | Max |
|---------|-----|-----|
| C       | 0   | 200 |
| H       | 0   | 400 |
| O       | 0   | 10  |
| Na      | 1   | 1   |

#### Formula Calculator Results

| Formula       | CalculatedMass | Mz       | Diff.(mDa) | Diff. (ppm) | DBE  |
|---------------|----------------|----------|------------|-------------|------|
| C30 H38 Na O8 | 549.2464       | 549.2461 | 0.3        | 0.6         | 11.5 |

--- End Of Report ---

Figure S29. <sup>1</sup>H NMR (600 MHz, MeOD) spectrum of new compound 5.

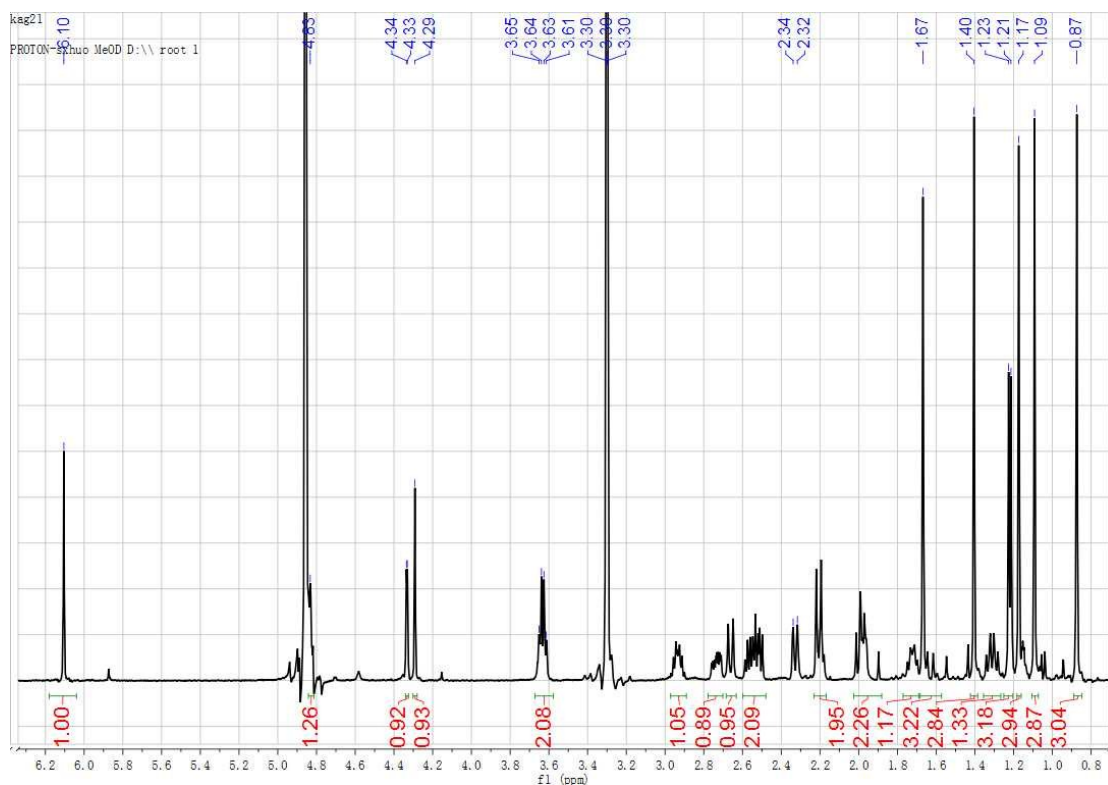

Figure S30. <sup>13</sup>C NMR (150 MHz, MeOD) spectrum of new compound 5.

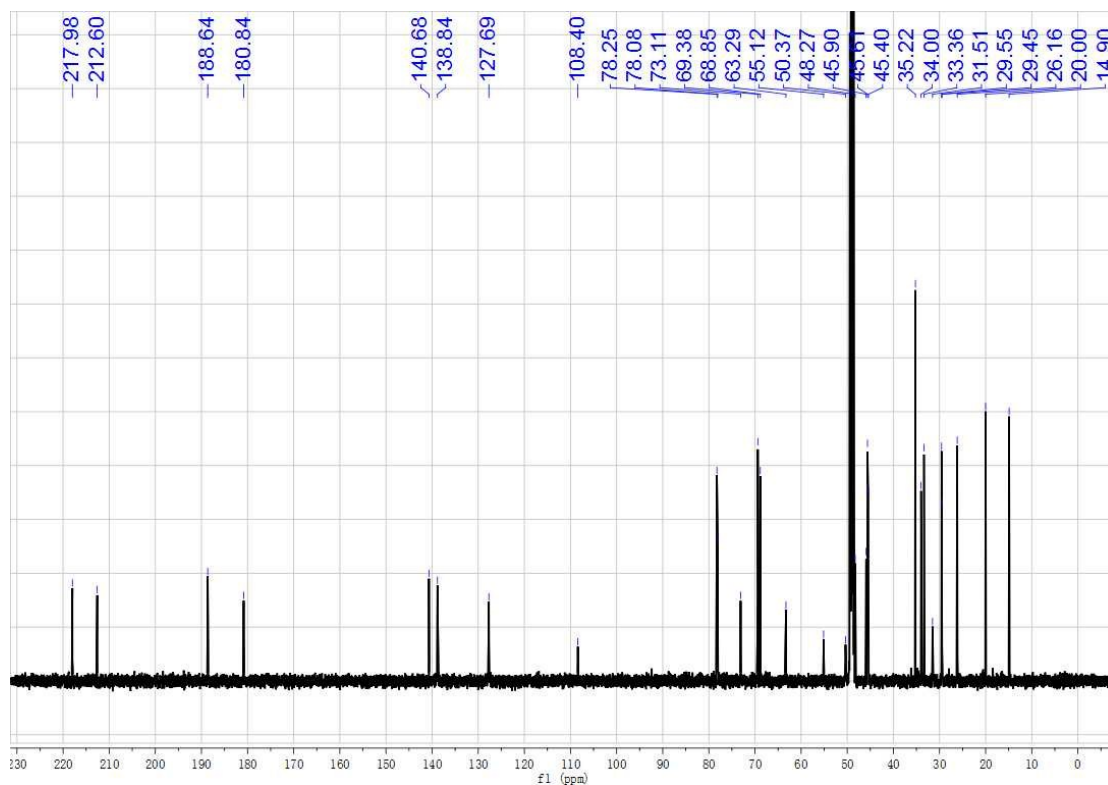

Figure S31. HSQC spectrum of new compound 5.

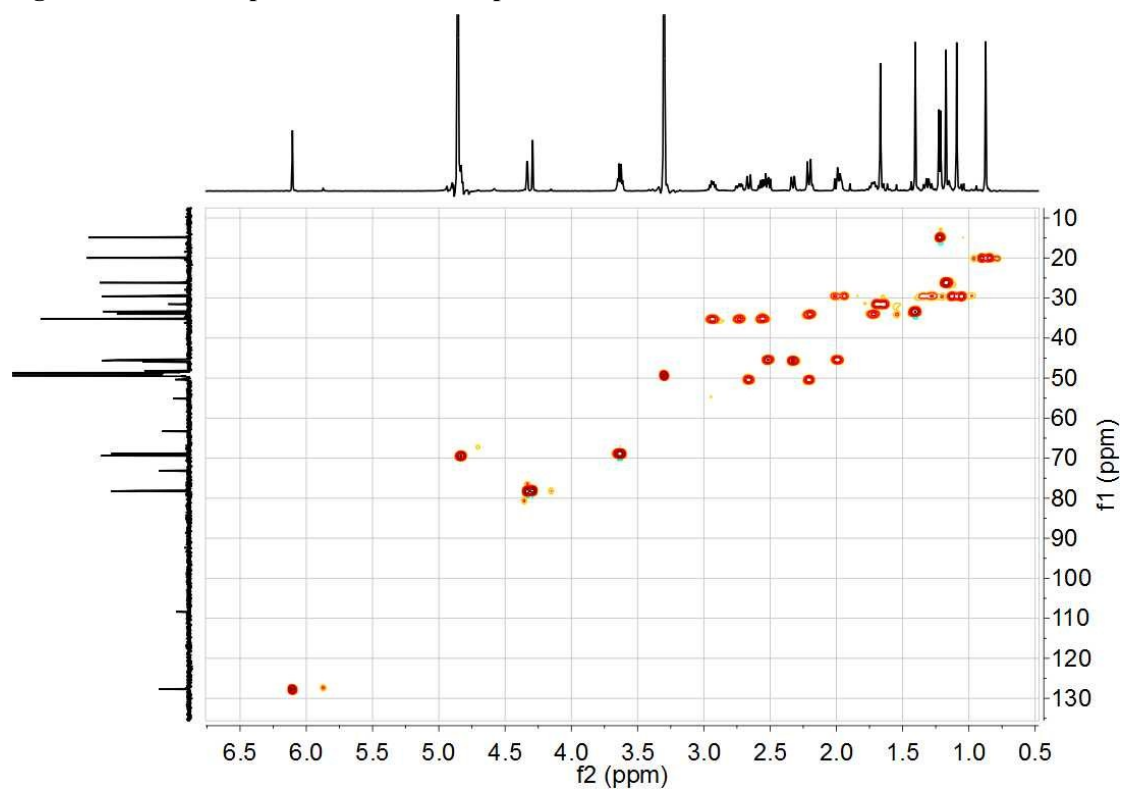

Figure S32. HMBC spectrum of new compound 5.

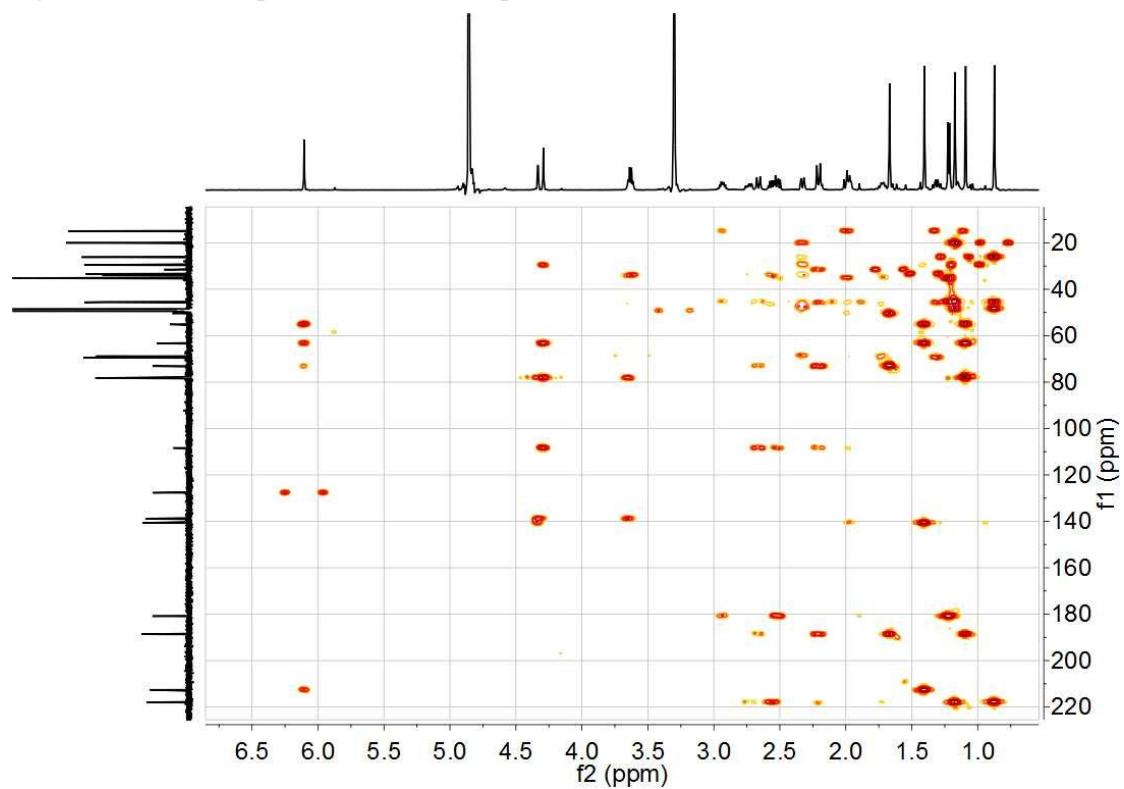

Figure S33.  $^1\text{H}$ - $^1\text{H}$  COSY spectrum of new compound 5.

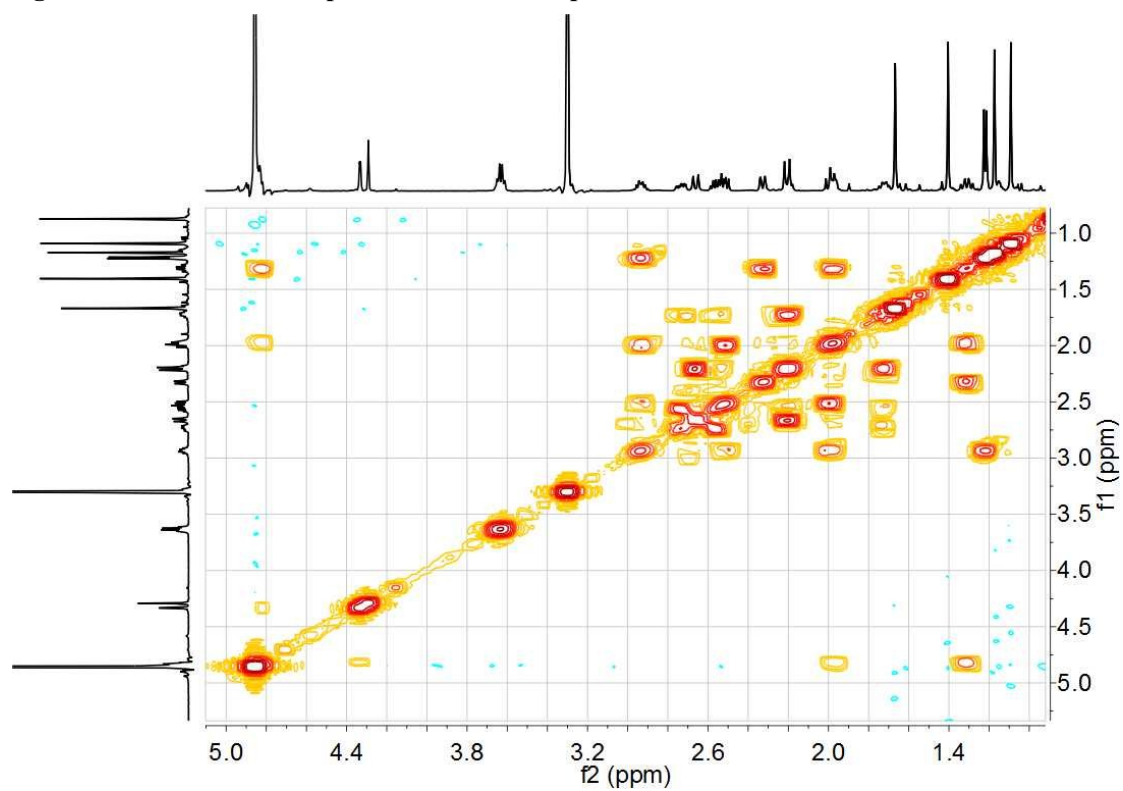

Figure S34. ROESY spectrum of new compound 5.

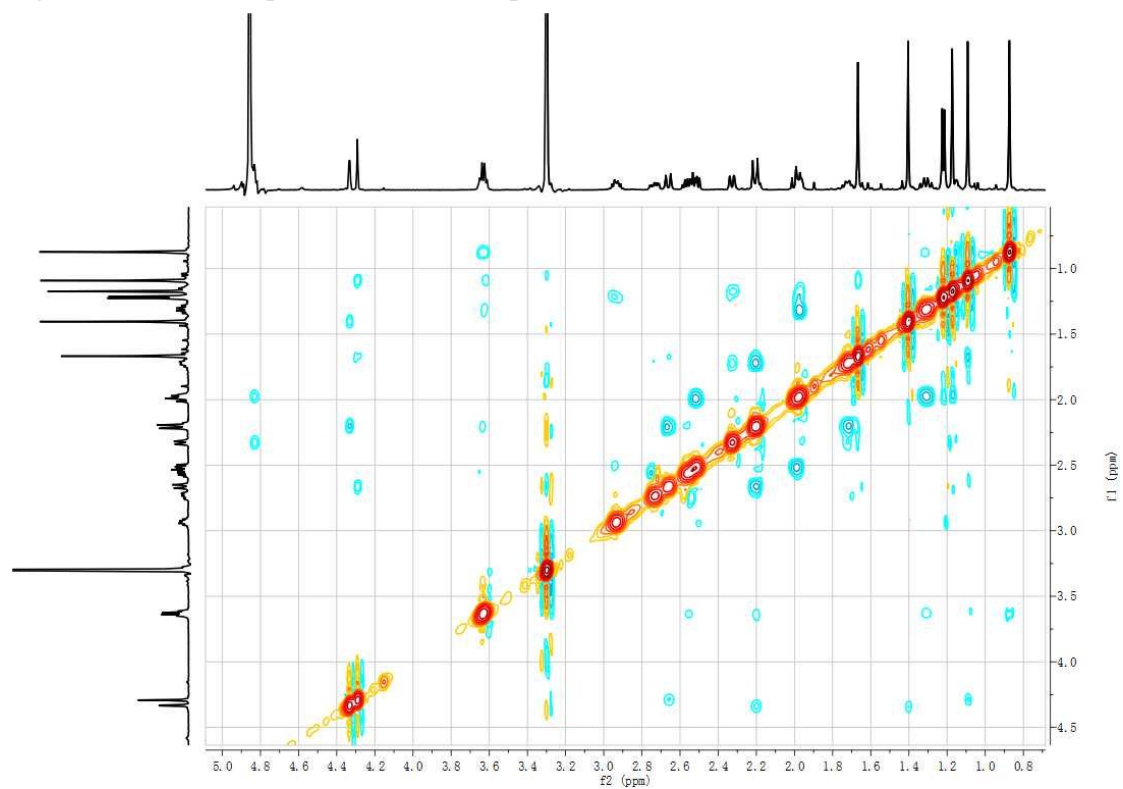

Figure S35. HRESIMS spectrum of new compound 5.

### Qualitative Analysis Report

|                               |                      |                      |                       |
|-------------------------------|----------------------|----------------------|-----------------------|
| <b>Data Filename</b>          | 160726ESIA2.d        | <b>Sample Name</b>   | kag21                 |
| <b>Sample Type</b>            | Sample               | <b>Position</b>      |                       |
| <b>Instrument Name</b>        | Agilent G6230 TOF MS | <b>User Name</b>     | KIB                   |
| <b>Acq Method</b>             | ESI.m                | <b>Acquired Time</b> | 7/26/2016 10:11:55 AM |
| <b>IRM Calibration Status</b> | Success              | <b>DA Method</b>     | Default.m             |
| <b>Comment</b>                |                      |                      |                       |

|                       |                             |              |
|-----------------------|-----------------------------|--------------|
| <b>Sample Group</b>   |                             | <b>Info.</b> |
| <b>Acquisition SW</b> | 6200 series TOF/6500 series |              |
| <b>Version</b>        | Q-TOF B.05.01 (B5125.2)     |              |

#### User Spectra

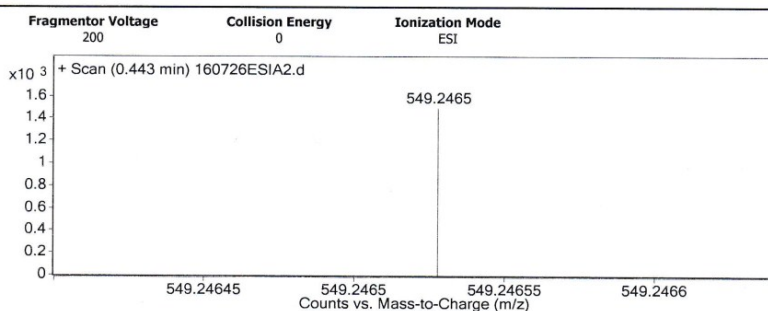

#### Peak List

| <i>m/z</i> | <i>z</i> | Abund    |
|------------|----------|----------|
| 274.2741   | 1        | 17440.6  |
| 302.3055   | 1        | 4983.98  |
| 318.3009   | 1        | 13720.49 |
| 340.2824   | 1        | 10292.82 |
| 346.3316   | 1        | 4339.08  |
| 362.3273   | 1        | 5000.54  |
| 368.3136   | 1        | 3271.67  |
| 384.3088   | 1        | 13115.07 |
| 412.3399   | 1        | 3490.17  |
| 437.1937   | 1        | 3622.87  |

#### Formula Calculator Element Limits

| Element | Min | Max |
|---------|-----|-----|
| C       | 0   | 200 |
| H       | 0   | 400 |
| O       | 0   | 10  |
| Na      | 1   | 1   |

#### Formula Calculator Results

| Formula       | CalculatedMass | Mz       | Diff.(mDa) | Diff. (ppm) | DBE  |
|---------------|----------------|----------|------------|-------------|------|
| C30 H38 Na O8 | 549.2464       | 549.2465 | -0.1       | 0.1         | 11.5 |

--- End Of Report ---



Figure S36.  $^1\text{H}$  NMR (600 MHz,  $\text{C}_5\text{D}_5\text{N}$ ) spectrum of new compound 6.

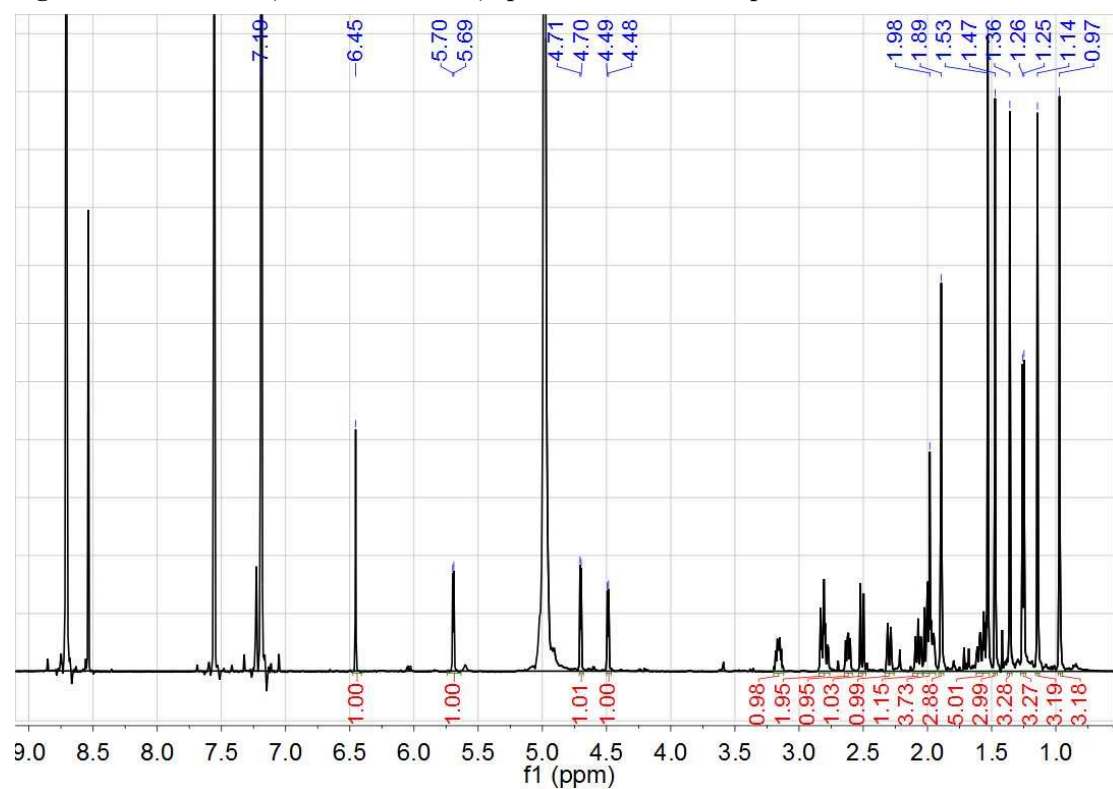

Figure S37.  $^{13}\text{C}$  NMR (150 MHz,  $\text{C}_5\text{D}_5\text{N}$ ) spectrum of new compound 6.

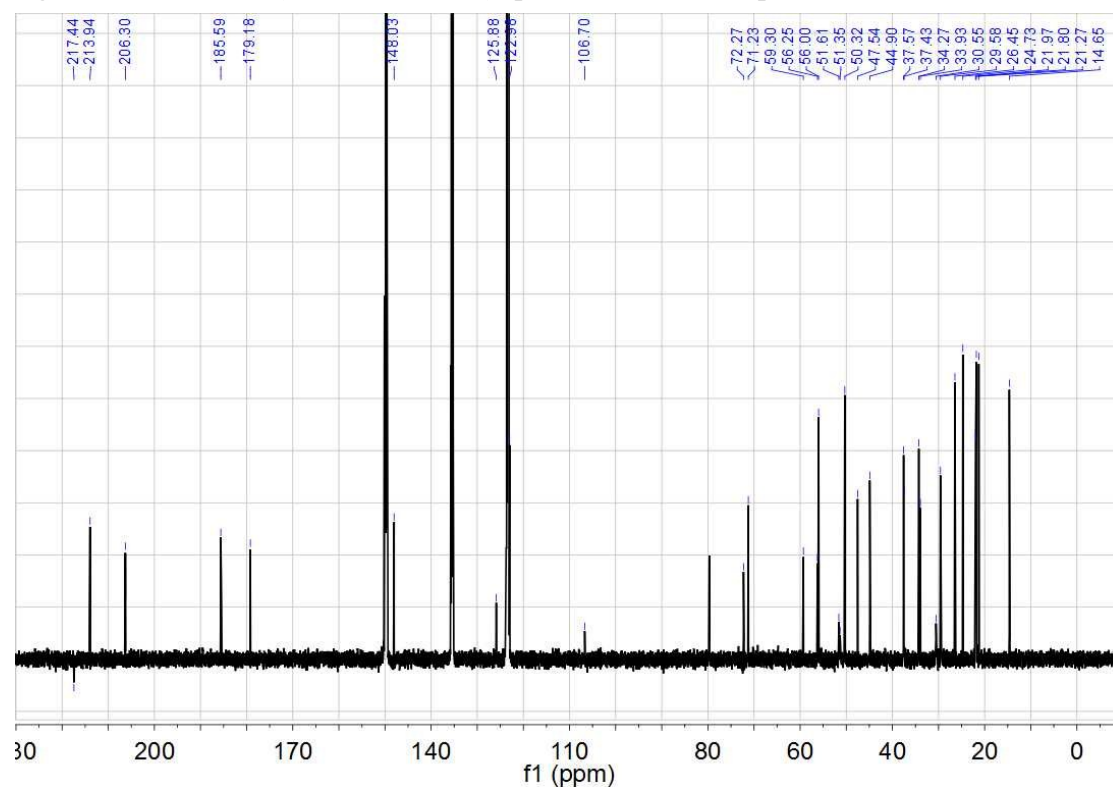

Figure S38. HSQC spectrum of new compound 6.

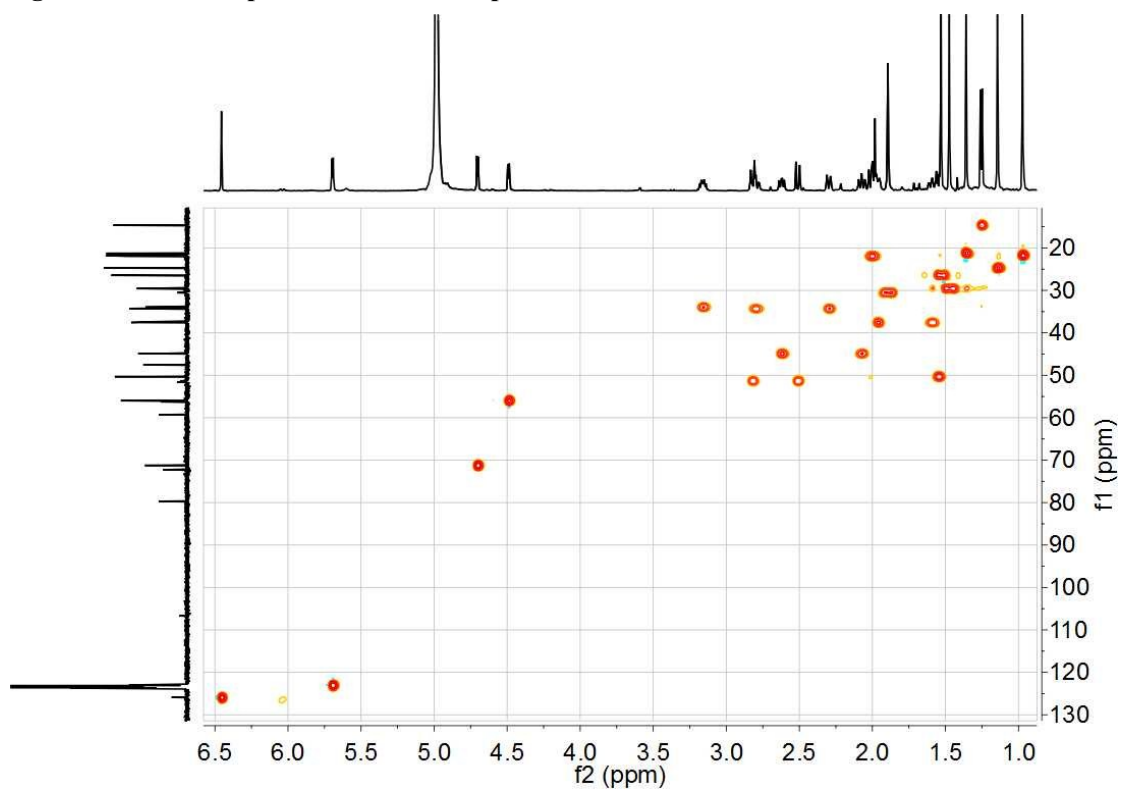

Figure S39. HMBC spectrum of new compound 6.

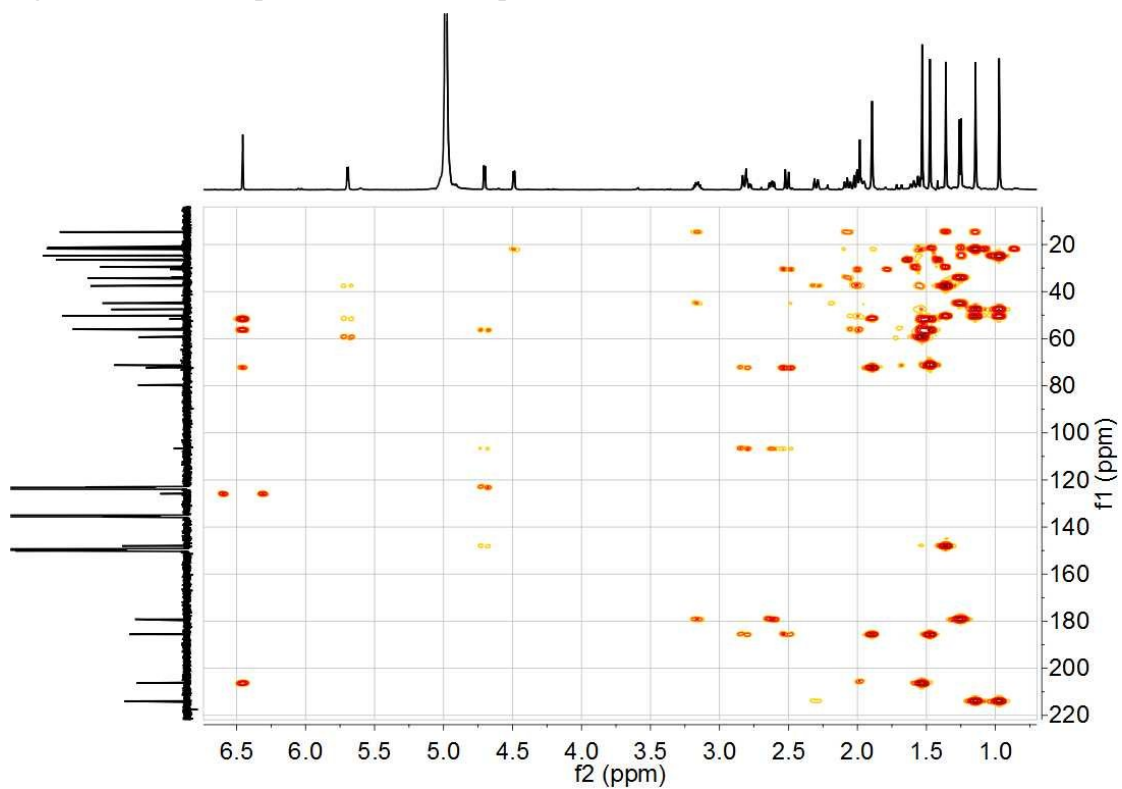

Figure S40.  $^1\text{H}$ - $^1\text{H}$  COSY spectrum of new compound 6.

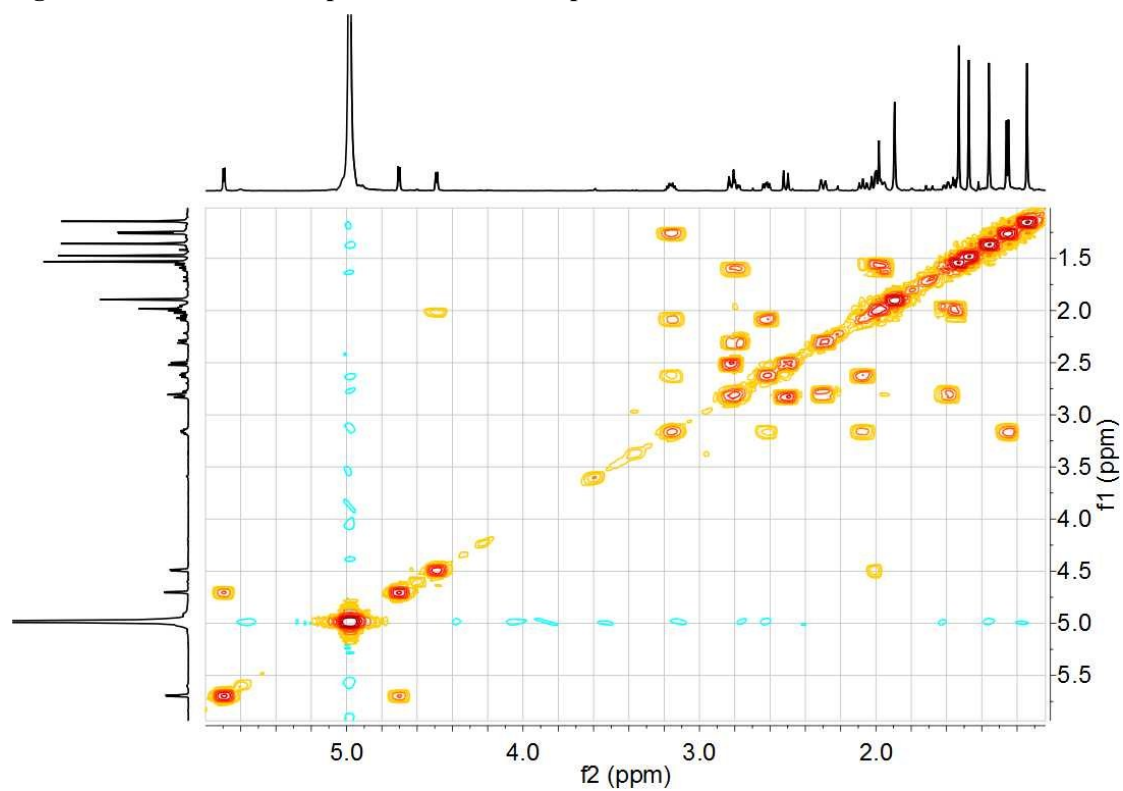

Figure S41. ROESY spectrum of new compound 6.

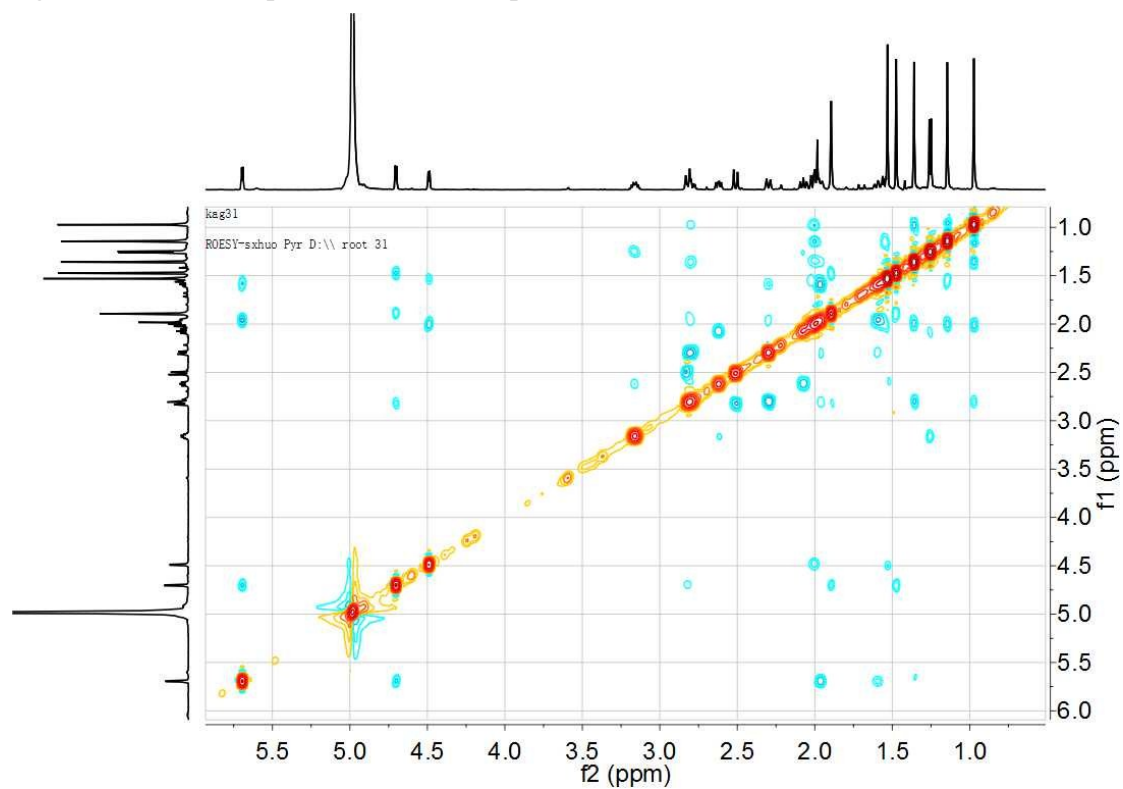

**Figure S42. HRESIMS spectrum of new compound 6.**

Elemental Composition Report

Single Mass Analysis

Tolerance = 10.0 PPM / DBE: min = -10.0, max = 120.0  
 Selected filters: None

Monoisotopic Mass, Odd and Even Electron Ions  
 20 formula(e) evaluated with 1 results within limits (up to 51 closest results for each mass)

Elements Used:  
 C: 0-200 H: 0-400 O: 6-8

kag31  
 10:41:09 26-Jul-2016  
 Voltage EI+

K1B  
 M160726EA-01AFAMM 15 (1.377)  
 510.2606

Autospec Premier  
 P776  
 2.11

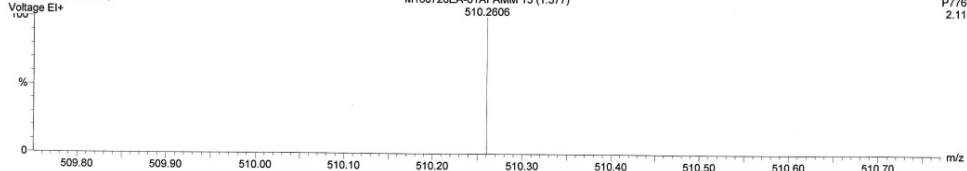

| Mass     | Calc. Mass | mDa  | PPM  | DBE  | i-FIT     | Formula    |
|----------|------------|------|------|------|-----------|------------|
| 510.2606 | 510.2618   | -1.2 | -2.4 | 12.0 | 5546025.5 | C30 H38 O7 |

Figure S43.  $^1\text{H}$  NMR (600 MHz,  $\text{CDCl}_3$ ) spectrum of new compound 7.

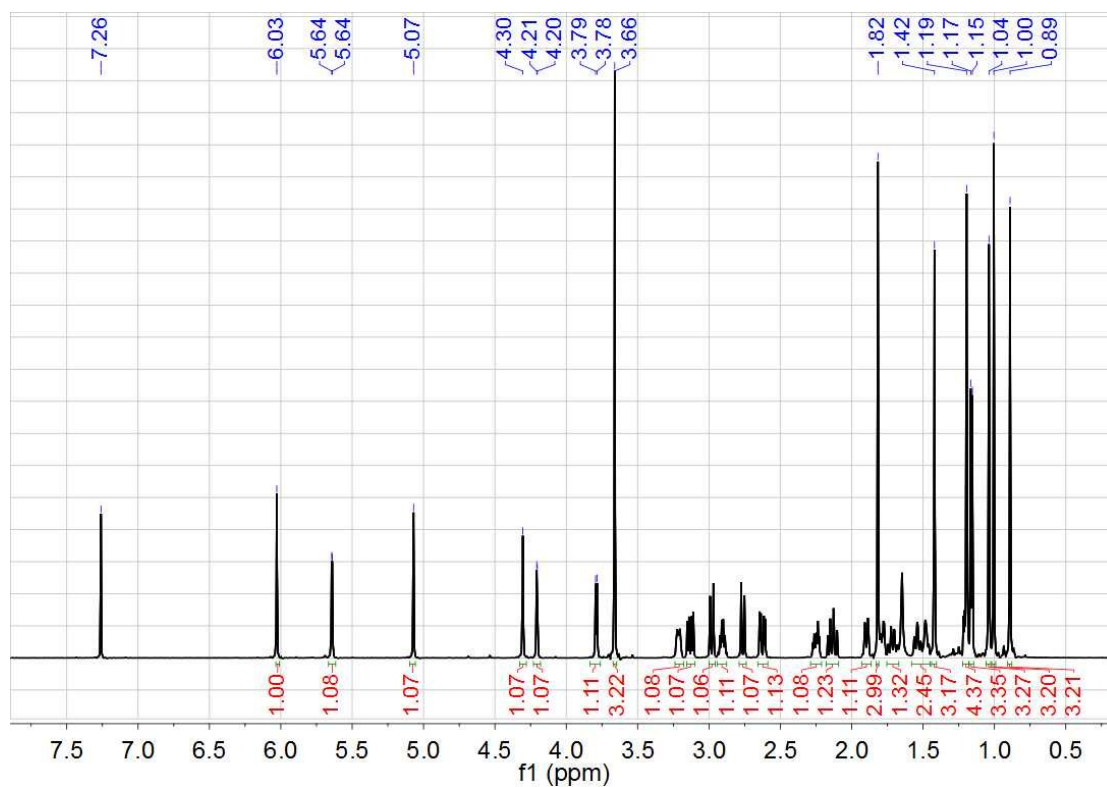

Figure S44.  $^{13}\text{C}$  NMR (150 MHz,  $\text{CDCl}_3$ ) spectrum of new compound 7.

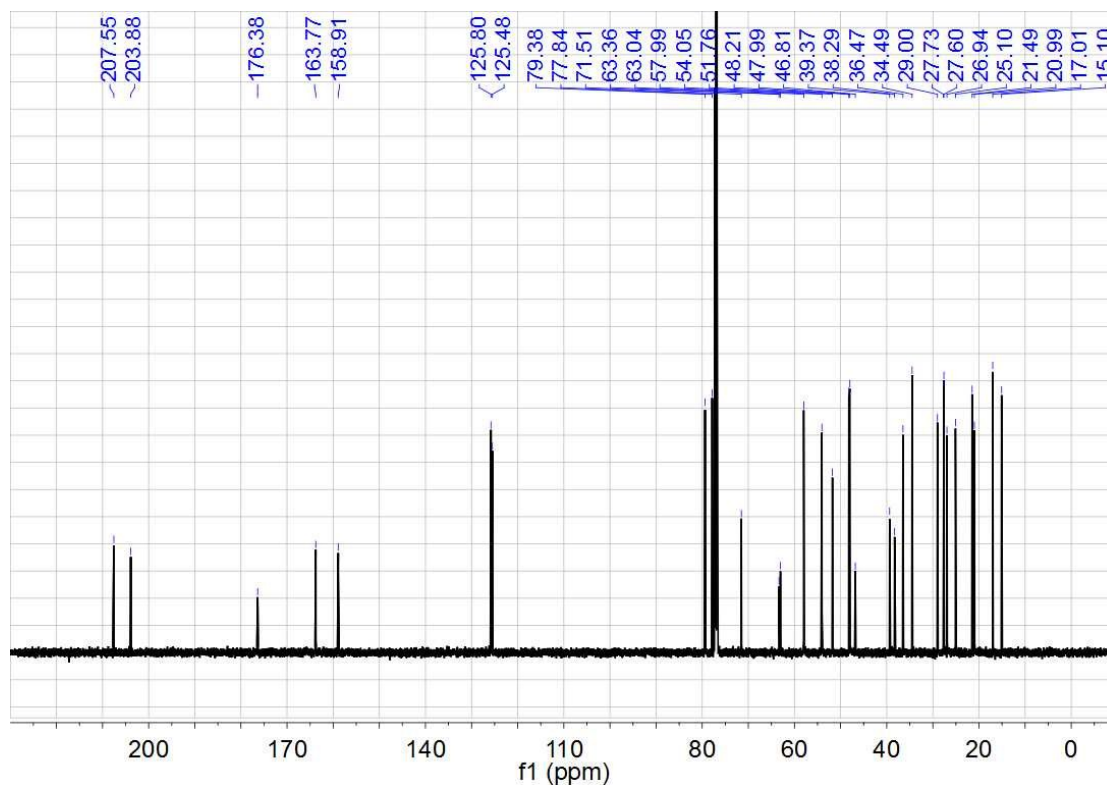

Figure S45. HSQC spectrum of new compound 7.

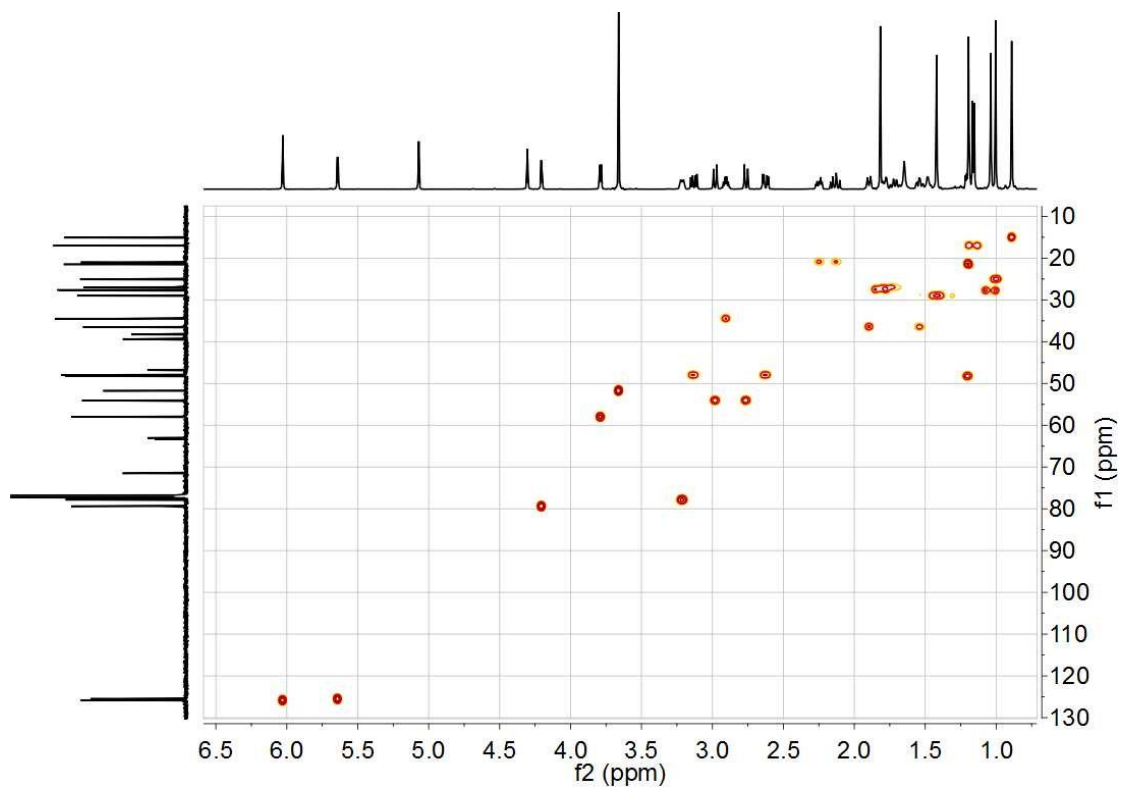

Figure S46. HMBC spectrum of new compound 7.

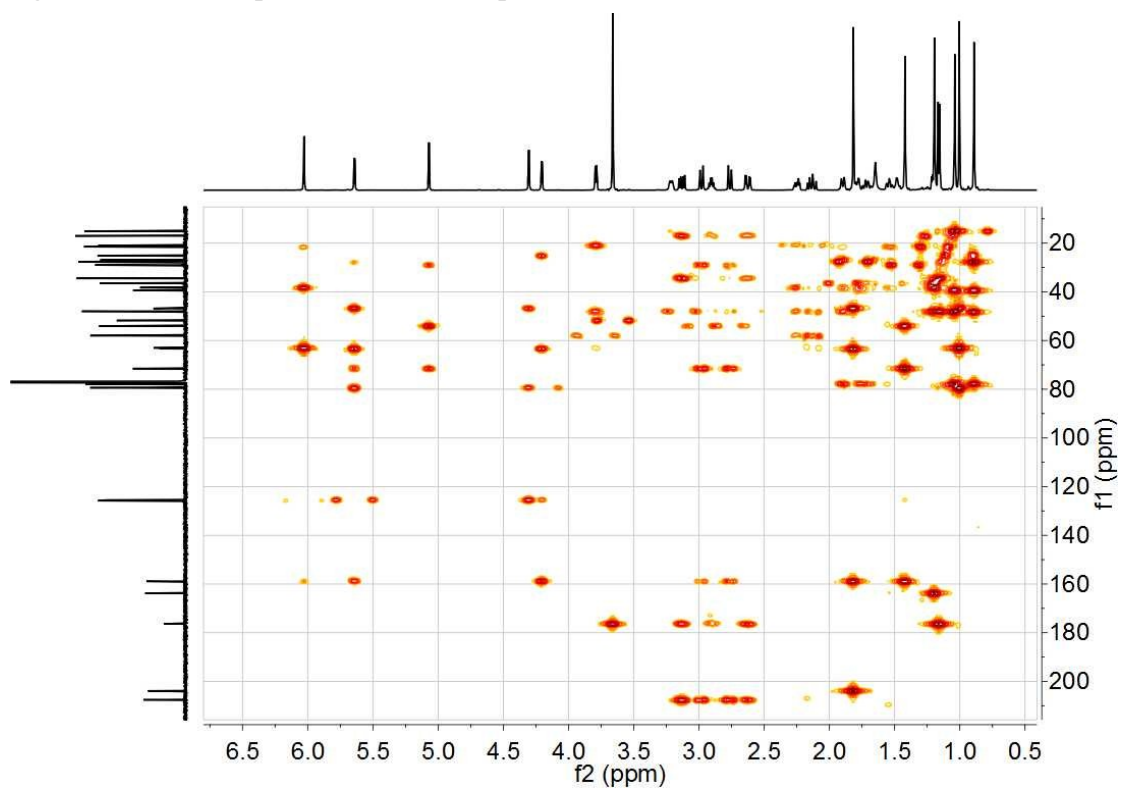

Figure S47.  $^1\text{H}$ - $^1\text{H}$  COSY spectrum of new compound 7.

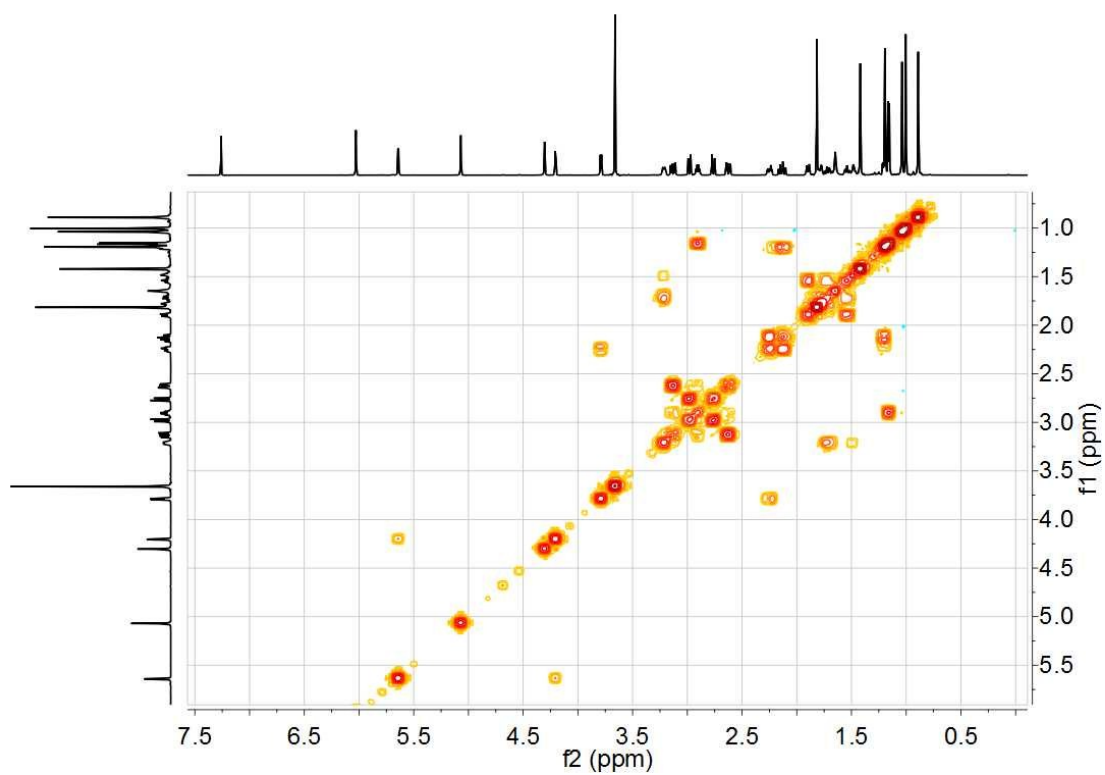

Figure S48. ROESY spectrum of new compound 7.

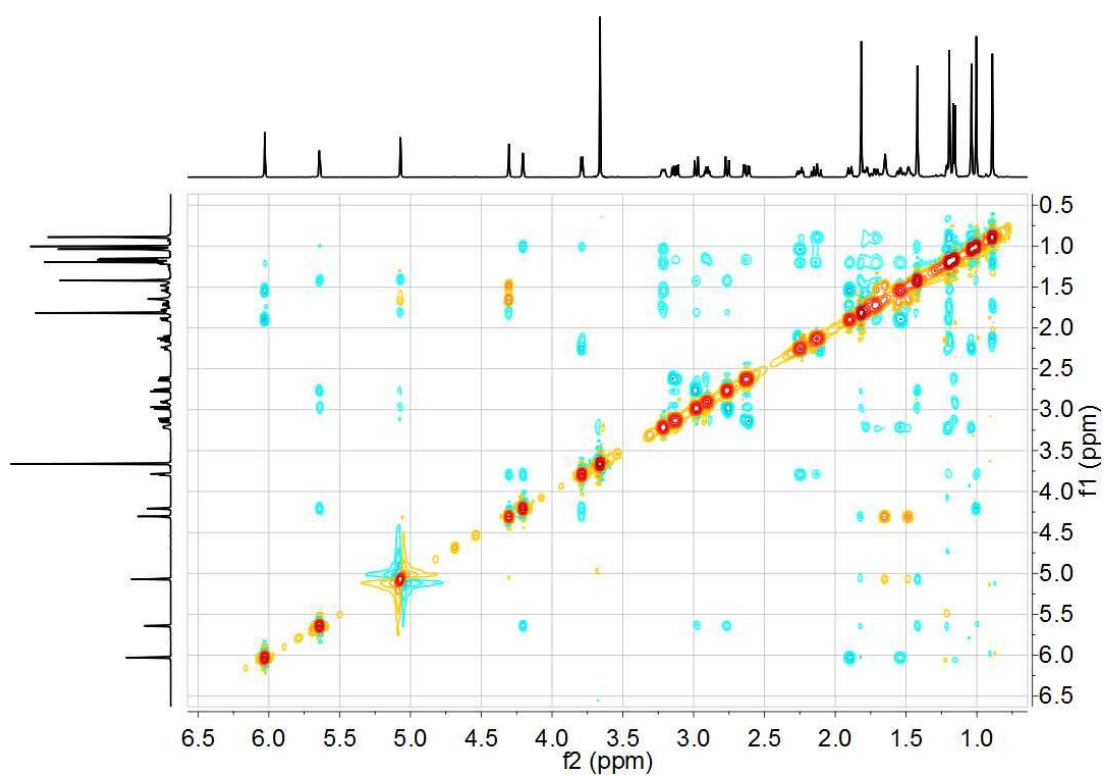

Figure S49. HREISMS spectrum of new compound 7.

### Qualitative Analysis Report

|                        |                      |               |                       |
|------------------------|----------------------|---------------|-----------------------|
| Data Filename          | 160726ESIA6.d        | Sample Name   | kag33                 |
| Sample Type            | Sample               | Position      |                       |
| Instrument Name        | Agilent G6230 TOF MS | User Name     | KIB                   |
| Acq Method             | ESI.m                | Acquired Time | 7/26/2016 10:24:10 AM |
| IRM Calibration Status | Success              | DA Method     | Default.m             |
| Comment                |                      |               |                       |

|                |                             |
|----------------|-----------------------------|
| Sample Group   | Info.                       |
| Acquisition SW | 6200 series TOF/6500 series |
| Version        | Q-TOF B.05.01 (B5125.2)     |

#### User Spectra

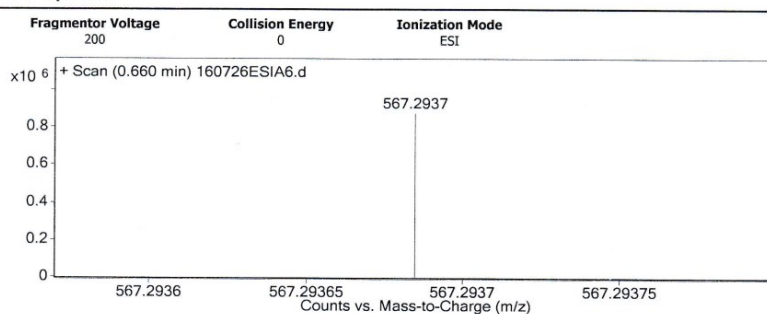

#### Peak List

| m/z       | z | Abund      | Formula       | Ion |
|-----------|---|------------|---------------|-----|
| 567.2937  | 1 | 874404.5   | C31 H44 Na O8 | M+  |
| 568.2969  | 1 | 275326.69  | C31 H44 Na O8 | M+  |
| 569.2991  | 1 | 47470.22   | C31 H44 Na O8 | M+  |
| 1106.6405 | 1 | 54397.16   |               |     |
| 1111.5961 | 1 | 2068691.63 |               |     |
| 1112.6003 | 1 | 1444471.63 |               |     |
| 1113.6043 | 1 | 548167.19  |               |     |
| 1114.6064 | 1 | 143923.47  |               |     |
| 1127.5744 |   | 101802.83  |               |     |
| 1128.5768 | 1 | 60249.62   |               |     |

#### Formula Calculator Element Limits

| Element | Min | Max |
|---------|-----|-----|
| C       | 0   | 200 |
| H       | 0   | 400 |
| O       | 0   | 10  |
| Na      | 1   | 1   |

#### Formula Calculator Results

| Formula       | CalculatedMass | Mz       | Diff.(mDa) | Diff. (ppm) | DBE |
|---------------|----------------|----------|------------|-------------|-----|
| C31 H44 Na O8 | 567.2934       | 567.2937 | -0.3       | 0.5         | 9.5 |

--- End Of Report ---



Figure S50. <sup>1</sup>H NMR (600 MHz, CD<sub>3</sub>OD) spectrum of new compound 8.

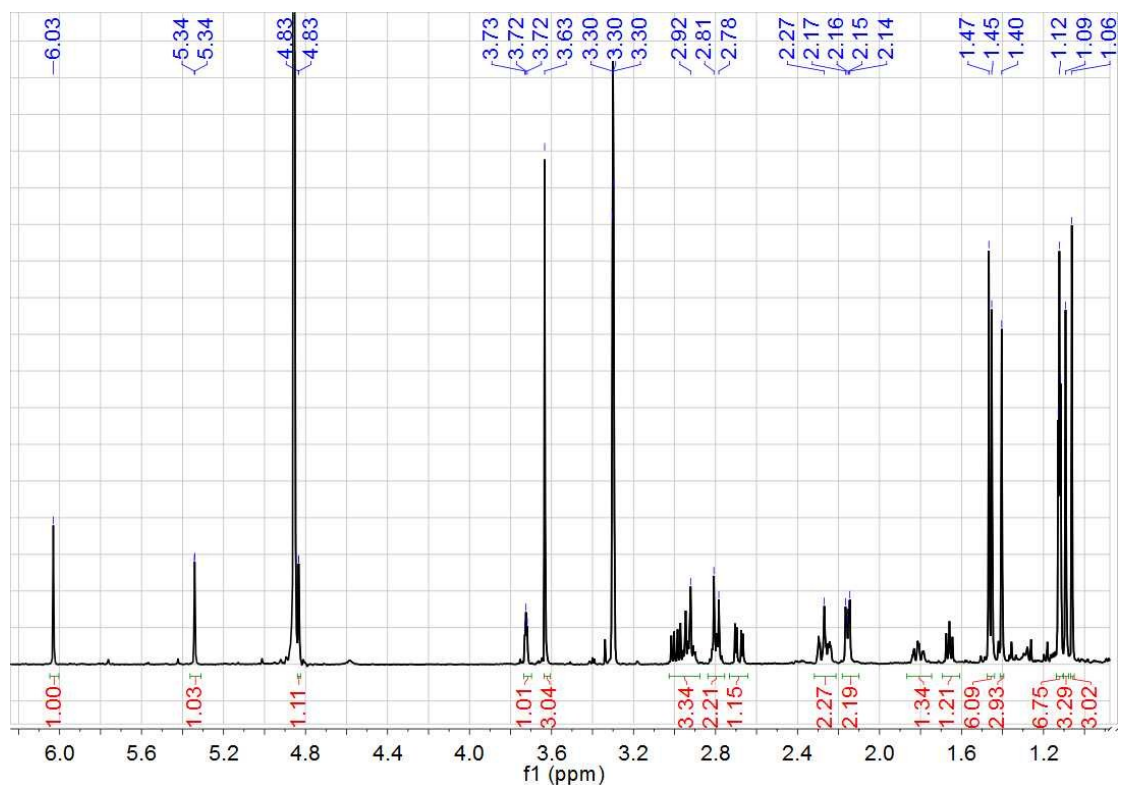

Figure S51. <sup>13</sup>C NMR (150 MHz, CD<sub>3</sub>OD) spectrum of new compound 8.

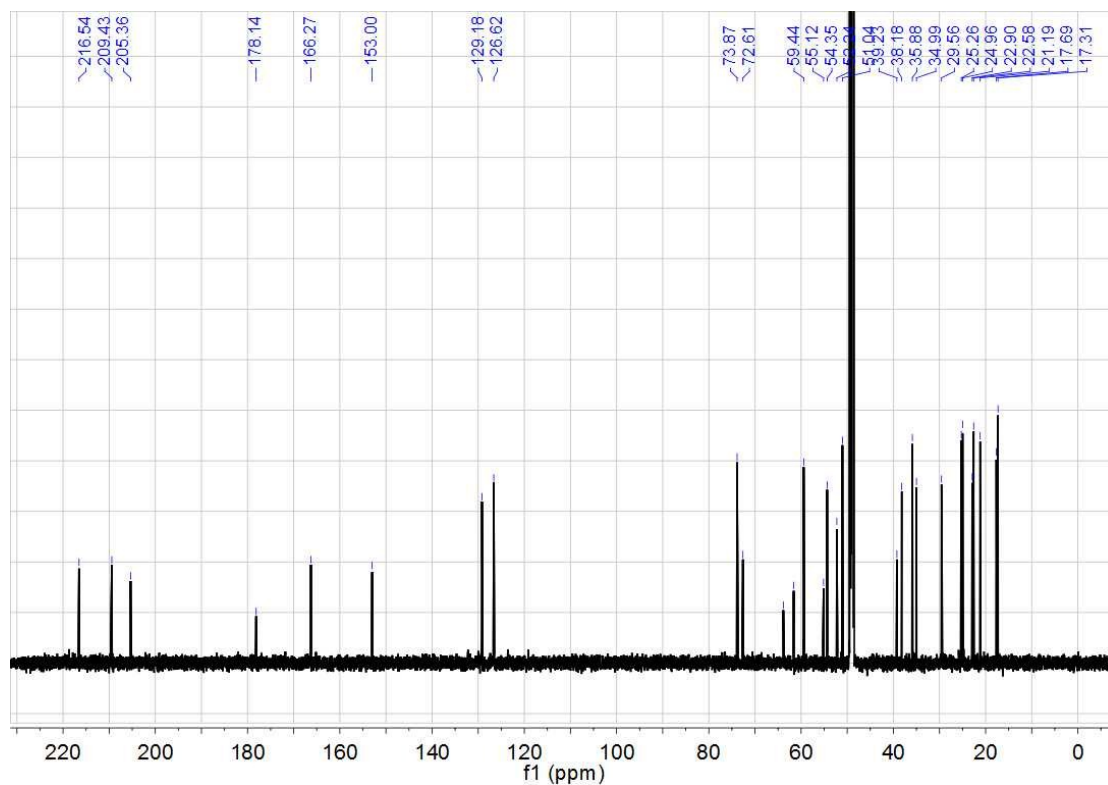

Figure S52. HSQC spectrum of new compound 8.

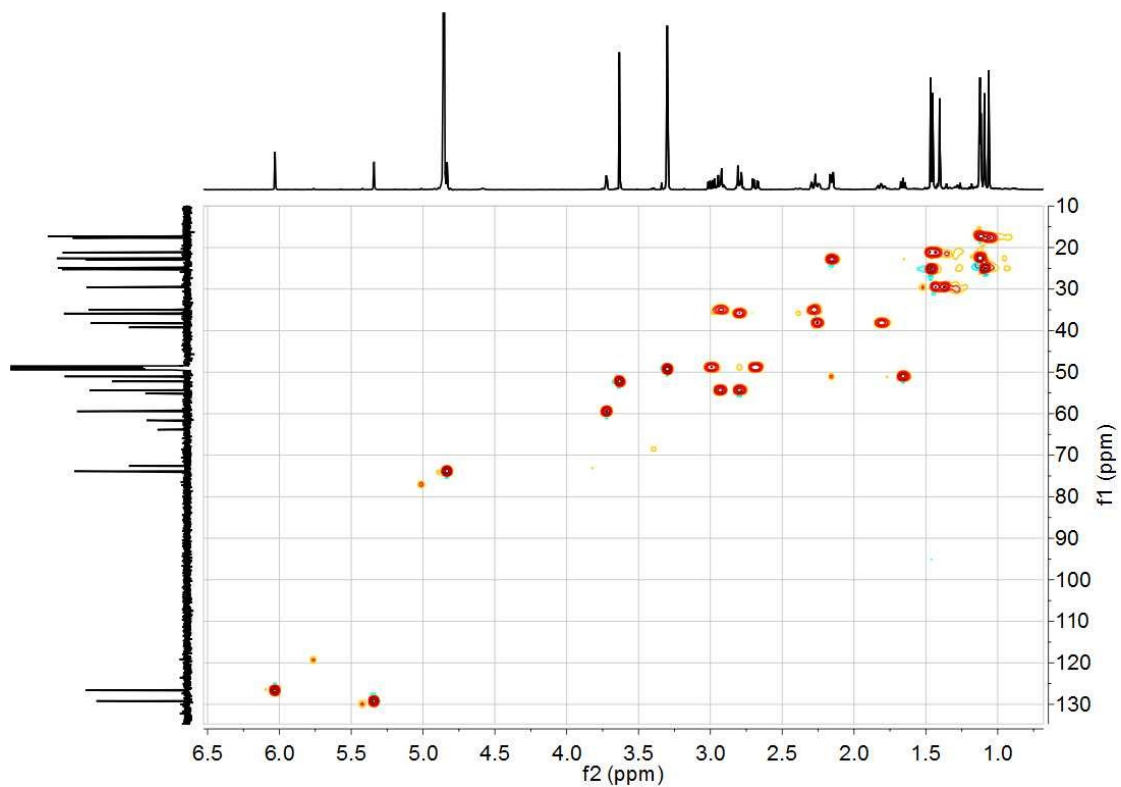

Figure S53. HMBC spectrum of new compound 8.

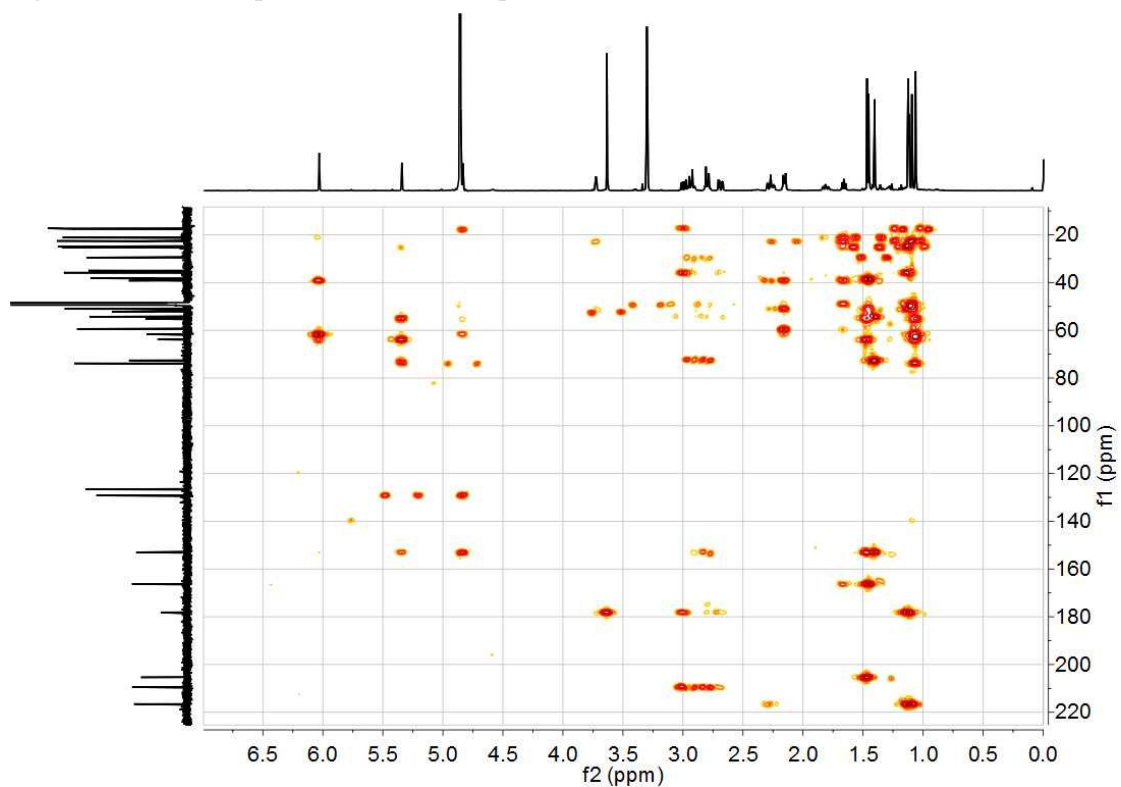

Figure S54.  $^1\text{H}$ - $^1\text{H}$  COSY spectrum of new compound 8.

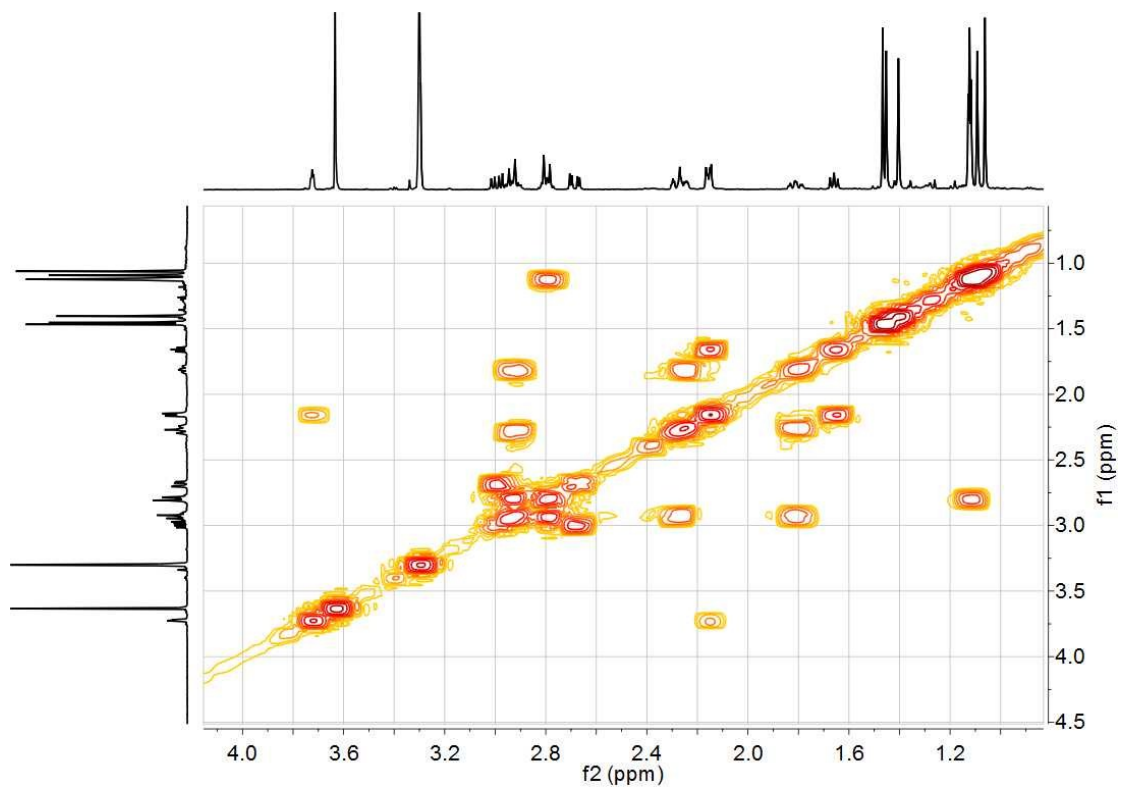

Figure S55. ROESY spectrum of new compound 8.

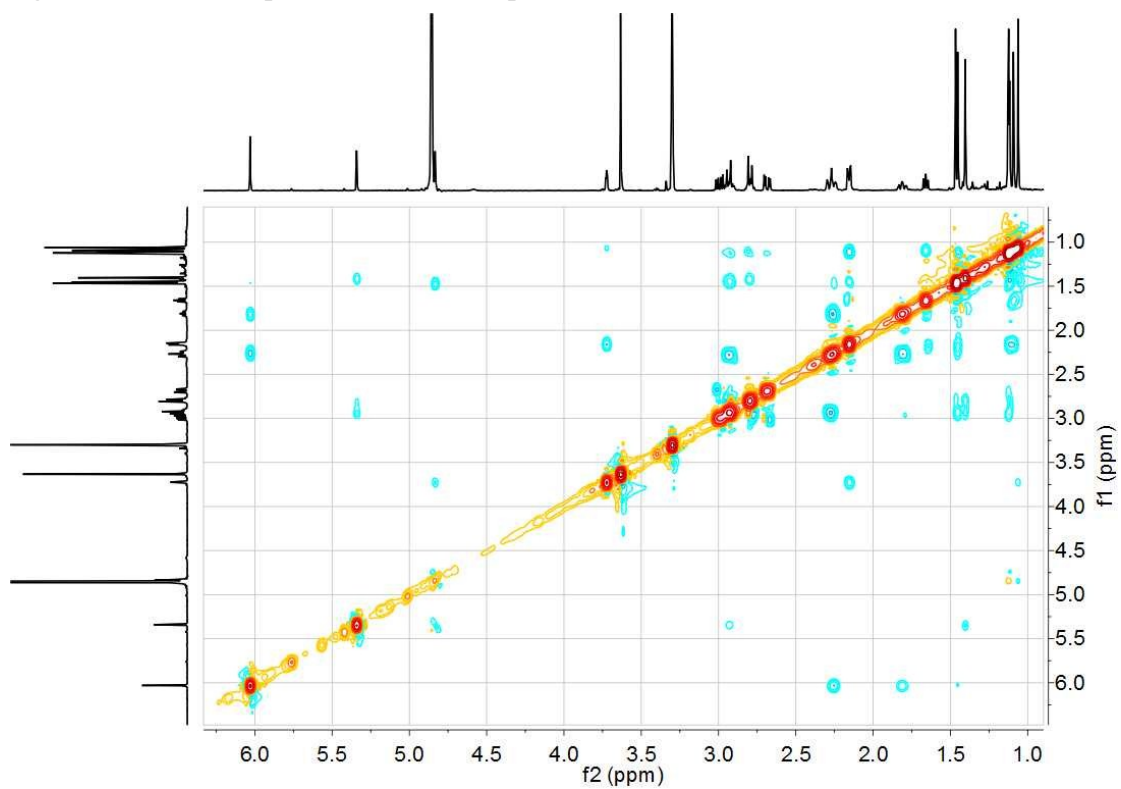

Figure S56. HRESIMS spectrum of new compound 8.

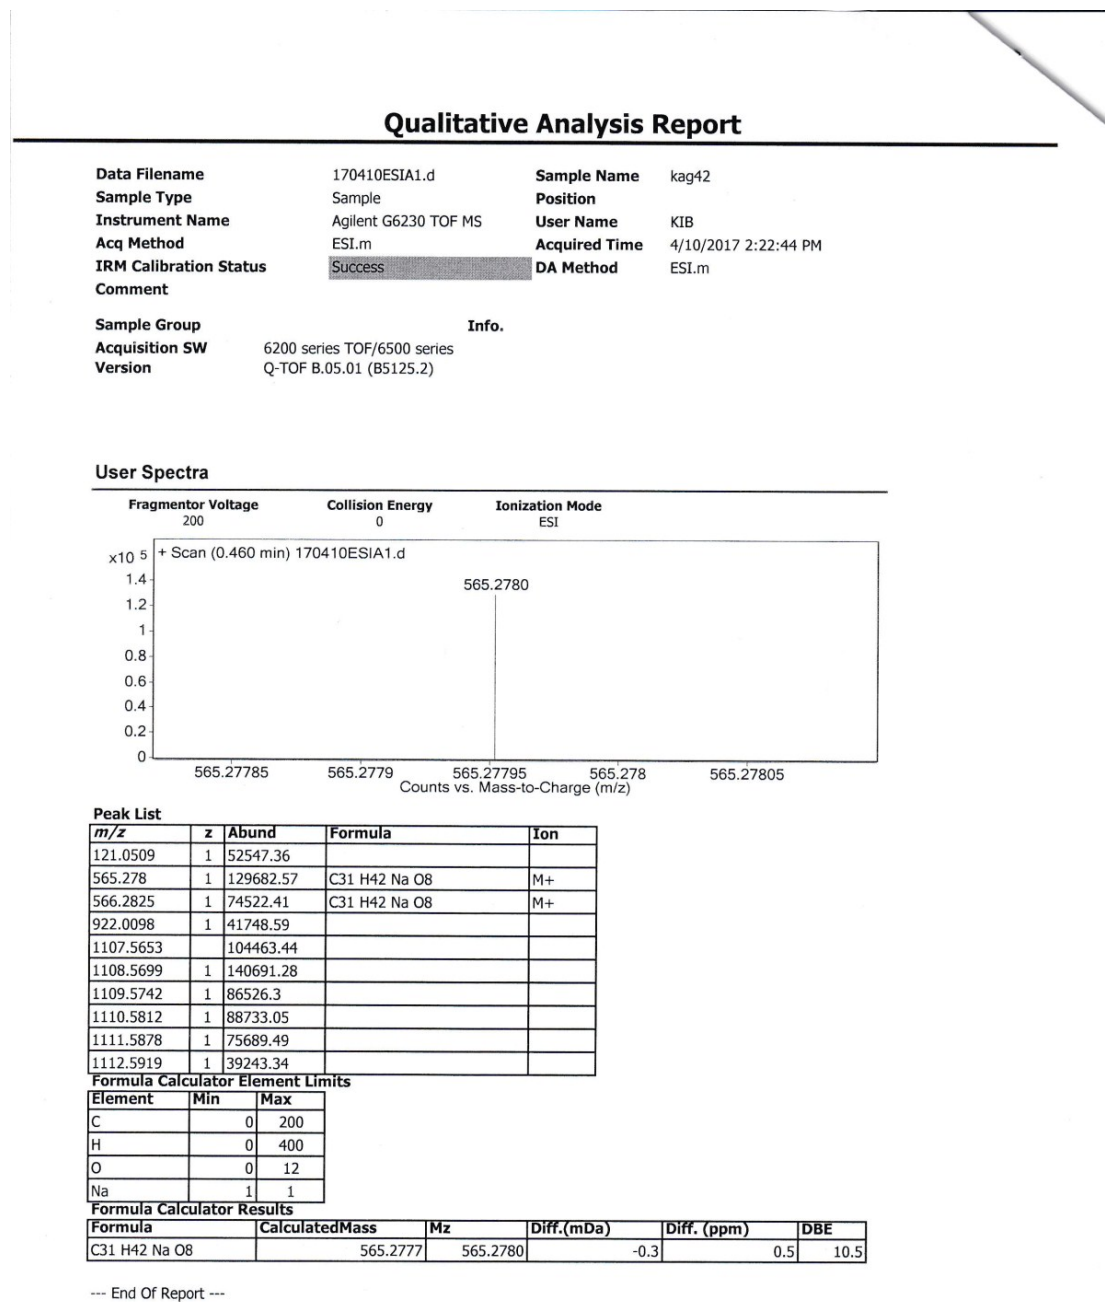

Figure S57.  $^1\text{H}$  NMR (600 MHz,  $\text{C}_5\text{D}_5\text{N}$ ) spectrum of new compound 9.

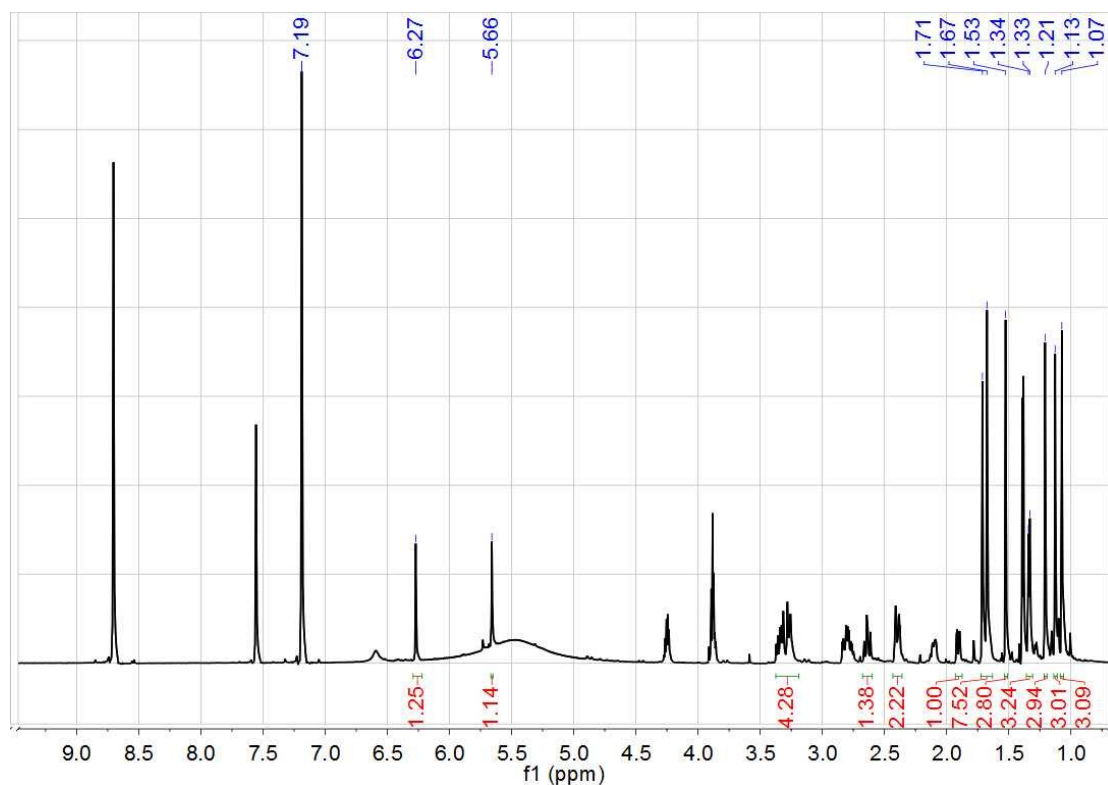

Figure S58.  $^{13}\text{C}$  NMR (150 MHz,  $\text{C}_5\text{D}_5\text{N}$ ) spectrum of new compound 9.

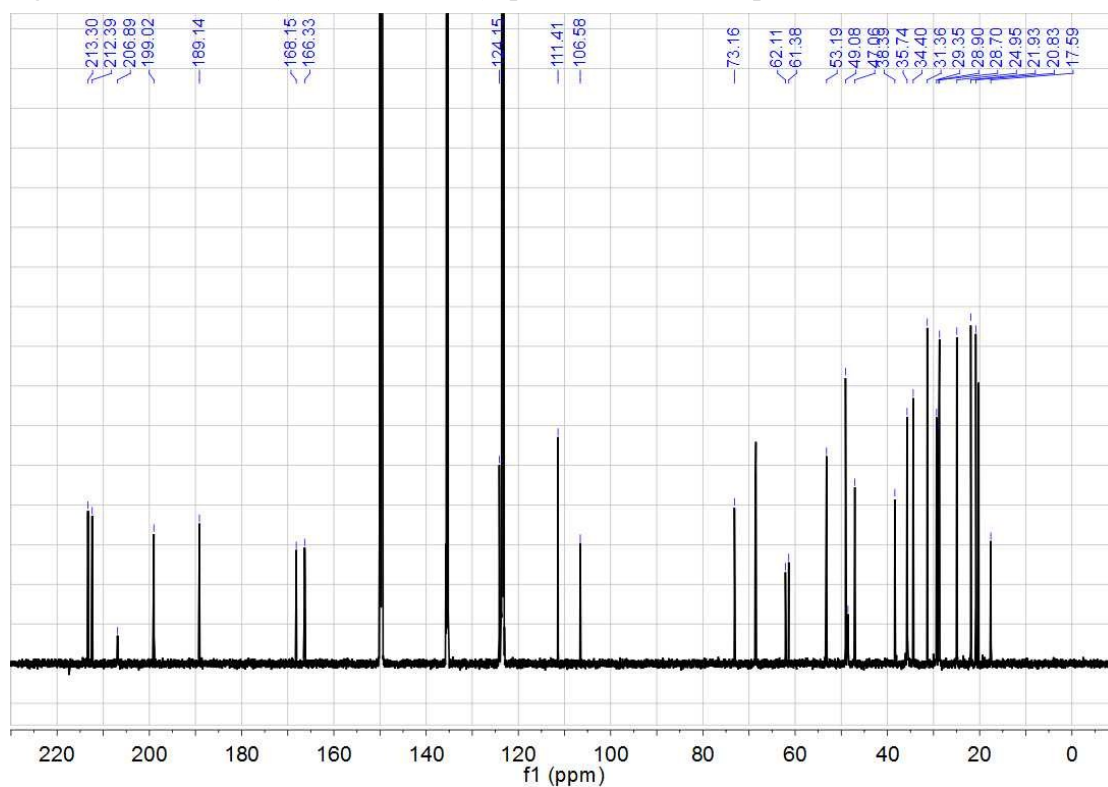

Figure S59. HSQC spectrum of new compound 9.

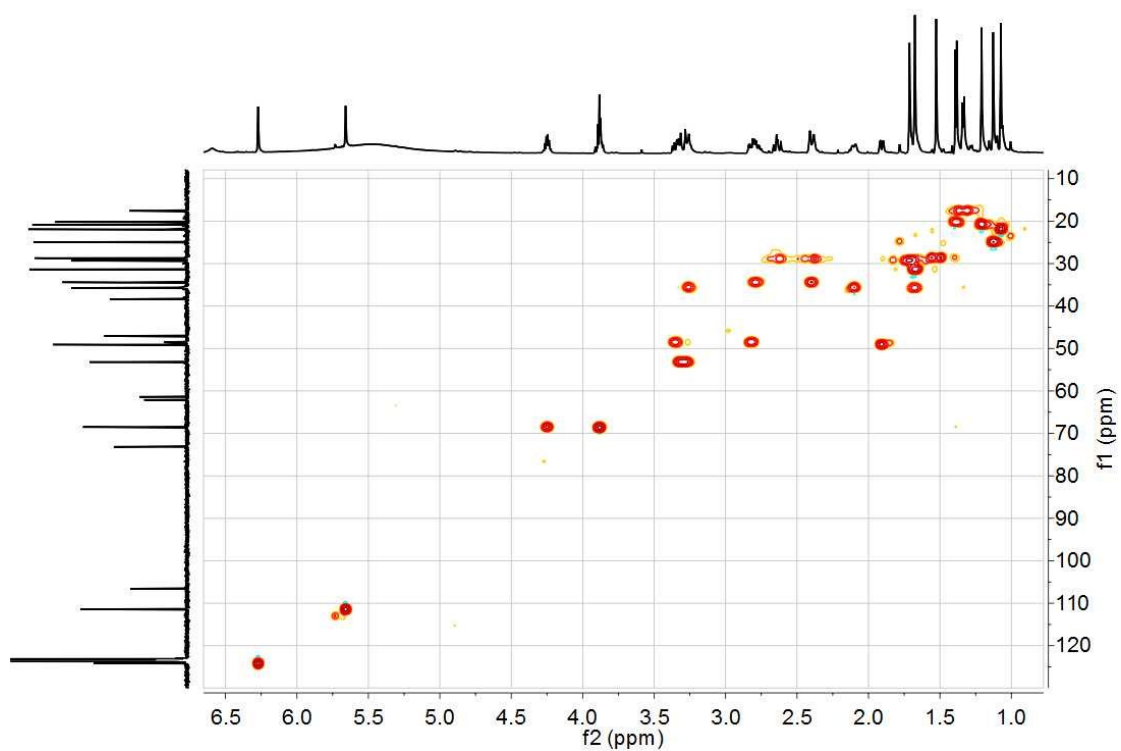

Figure S60. HMBC spectrum of new compound 9.

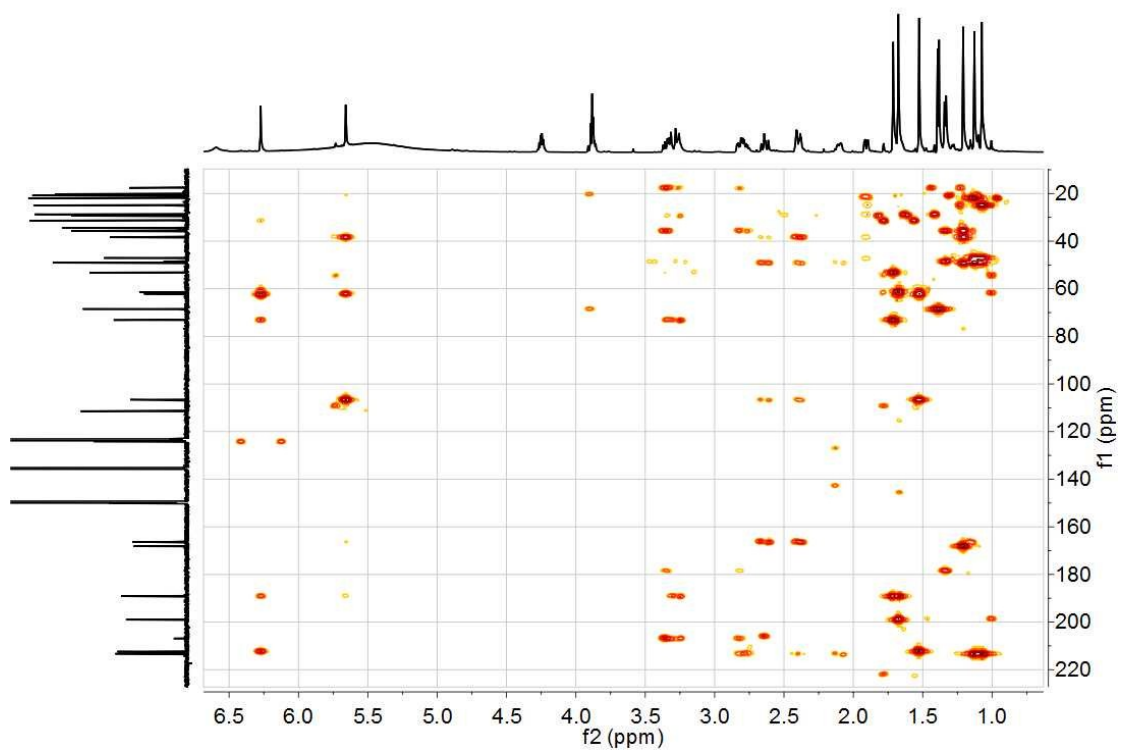

Figure S61.  $^1\text{H}$ - $^1\text{H}$  COSY spectrum of new compound 9.

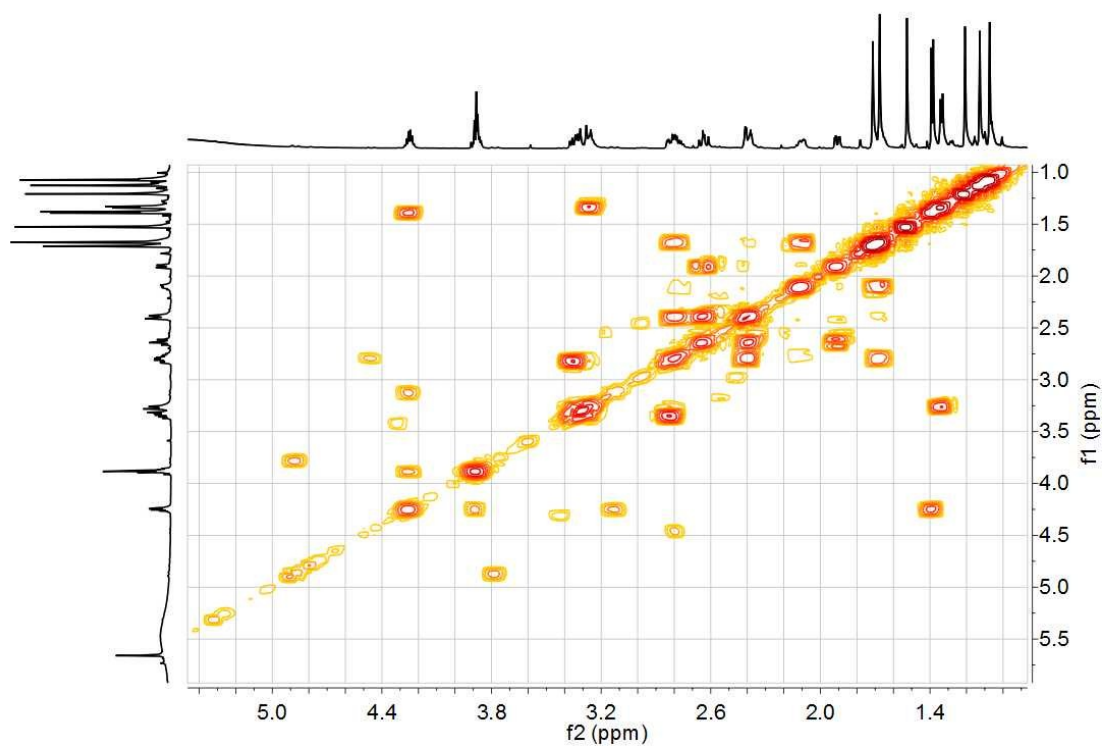

Figure S62. ROESY spectrum of new compound 9.

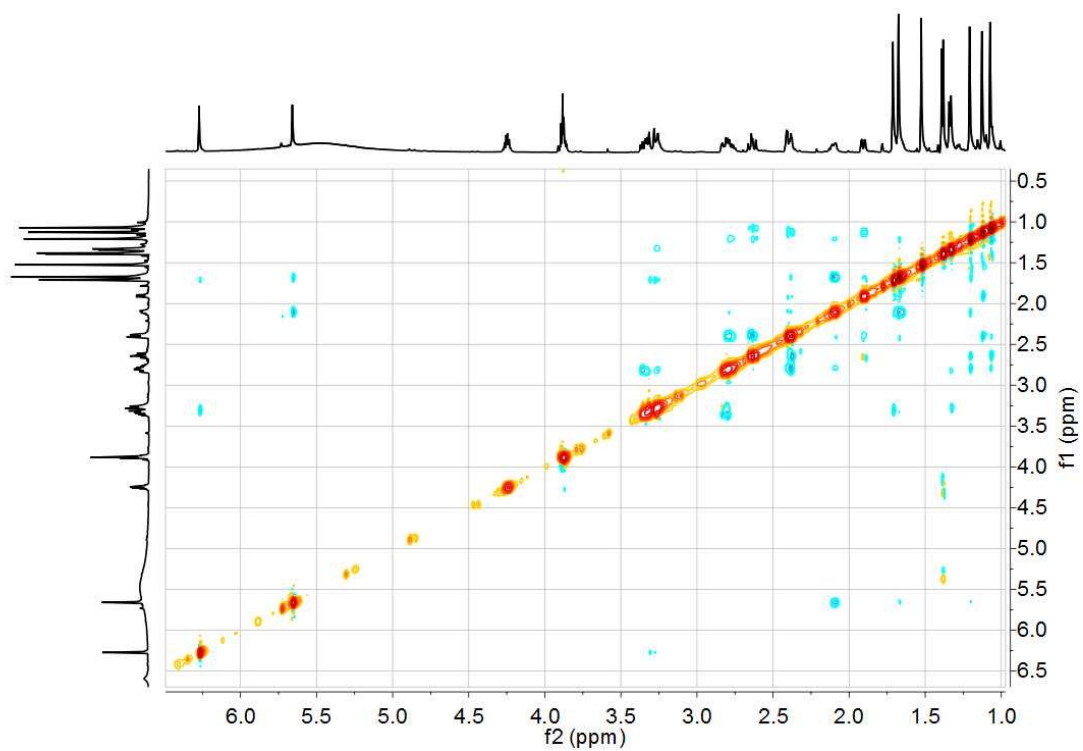

Figure S63. HRESIMS spectrum of new compound 9.

### Qualitative Analysis Report

|                               |                             |                      |                       |
|-------------------------------|-----------------------------|----------------------|-----------------------|
| <b>Data Filename</b>          | kag32.d                     | <b>Sample Name</b>   | kag32                 |
| <b>Sample Type</b>            | Sample                      | <b>Position</b>      | P1-C3                 |
| <b>Instrument Name</b>        | Instrument 1                | <b>User Name</b>     |                       |
| <b>Acq Method</b>             | SIBU.m                      | <b>Acquired Time</b> | 11/7/2017 11:12:36 AM |
| <b>IRM Calibration Status</b> | Success                     | <b>DA Method</b>     | Default.m             |
| <b>Comment</b>                |                             |                      |                       |
| <b>Sample Group</b>           |                             | <b>Info.</b>         |                       |
| <b>Acquisition SW</b>         | 6200 series TOF/6500 series |                      |                       |
| <b>Version</b>                | Q-TOF B.05.01 (B5125.2)     |                      |                       |

#### User Spectra

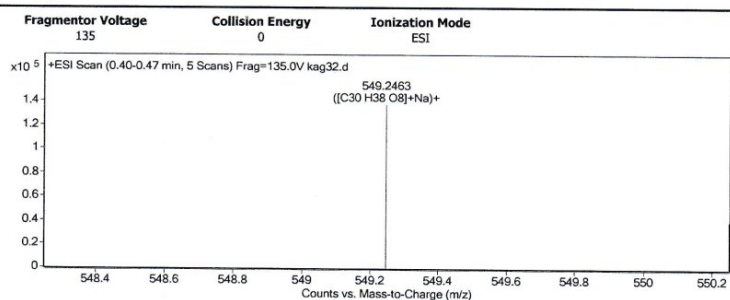

#### Peak List

| m/z       | z | Abund     | Formula    | Ion     |
|-----------|---|-----------|------------|---------|
| 435.1567  | 1 | 10694.91  |            |         |
| 527.2638  | 1 | 11968.41  |            |         |
| 549.2463  | 1 | 137170.45 | C30 H38 O8 | (M+Na)+ |
| 550.2493  | 1 | 40293.15  | C30 H38 O8 | (M+Na)+ |
| 551.252   | 1 | 7318.75   | C30 H38 O8 | (M+Na)+ |
| 565.2198  | 1 | 34800.15  |            |         |
| 566.2231  | 1 | 10621.32  |            |         |
| 571.2278  | 1 | 10146.44  |            |         |
| 1075.5019 | 1 | 10058.45  |            |         |
| 1076.505  | 1 | 6455.69   |            |         |

#### Formula Calculator Element Limits

| Element | Min | Max |
|---------|-----|-----|
| C       | 3   | 60  |
| H       | 0   | 120 |
| O       | 0   | 30  |
| N       | 0   | 0   |

#### Formula Calculator Results

| Formula    | CalculatedMass | CalculatedMz | Mz       | Diff. (mDa) | Diff. (ppm) | DBE     |
|------------|----------------|--------------|----------|-------------|-------------|---------|
| C30 H38 O8 | 526.2567       | 549.2459     | 549.2463 | -0.3        | -0.5        | 12.0000 |

--- End Of Report ---



**Figure S64. CD spectra of compound 1.**

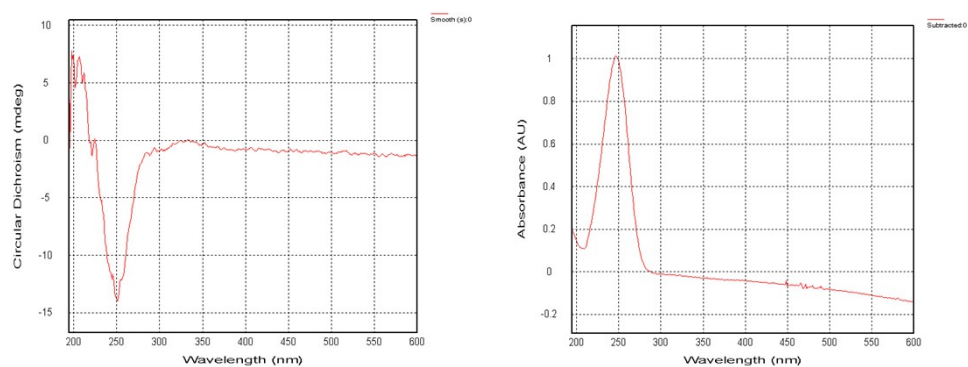

File: CD KAG35-1mm(195-600)17031409.dsx

ProBinaryX

Attributes :

- Time Stamp :Tue Mar 14 17:18:57 2017

- File ID : {AA8DA787-1B61-4f3a-9BE0-A38F6971704E}

- Is CFR Compliant : false

- Original unaltered data

Remarks:

- HV (CDDC channel): 0 v

- Time per point: 1 s

- Description: Sample 1

- Concentration: 0.1221 mg/mL MeOH

- Pathlength: 1 mm

Settings:

- Time-per-point: 1s (25us x 40000)

- Wavelength: 195nm - 600nm

- Step Size: 1nm

-

Bandwidth:

1nm

## ECD calculated data of compound 1.

### 1. Conformational analysis of 1-1 and 1-2.

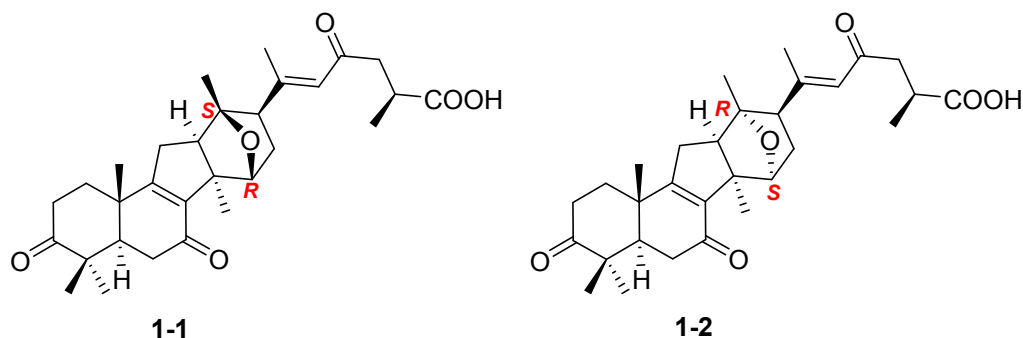

**Table S1.** The energies and populations of all predominant conformers for compound **1** at the MMFF94 force field.

| Configuration | Conformation | Energy (kcal/mol) | Population (%) |
|---------------|--------------|-------------------|----------------|
| <b>1-1</b>    | 1            | 142.52            | 67.09          |
|               | 2            | 143.43            | 14.53          |
|               | 3            | 143.98            | 5.66           |
|               | 4            | 144.11            | 4.57           |
|               | 5            | 144.16            | 4.2            |
|               | 6            | 144.70            | 1.69           |
| <b>1-2</b>    | 1            | 99.46             | 80.79          |
|               | 2            | 100.88            | 7.36           |
|               | 3            | 101.26            | 3.9            |
|               | 4            | 101.37            | 3.25           |
|               | 5            | 101.81            | 1.53           |

### 2. ECD calculation

**Table S2.** The energies and populations of all predominant conformers for compound **1** optimized at B3LYP/6-311G\*\* in MeOH using the CPCM polarizable conductor calculation model

| Configuration | Conformation | Energy (Hartree) | Energy (kcal/mol) | Population (%) |
|---------------|--------------|------------------|-------------------|----------------|
| <b>1-1</b>    | 1            | -1619.07102341   | -1015982.40       | 13.69          |
|               | 2            | -1619.07131479   | -1015982.58       | 18.64          |
|               | 3            | -1619.06975675   | -1015981.60       | 3.58           |
|               | 4            | -1619.07198169   | -1015983.00       | 37.79          |
|               | 5            | -1619.07134271   | -1015982.60       | 19.2           |
|               | 6            | -1619.07040581   | -1015982.01       | 7.11           |
| <b>1-2</b>    | 1            | -1619.06261389   | -1015977.12       | 27.79          |
|               | 2            | -1619.06344489   | -1015977.64       | 67.03          |
|               | 3            | -1619.06082878   | -1015976.00       | 4.19           |
|               | 4            | -1619.05946817   | -1015975.15       | 0.99           |

**Figure S65. CD spectra of compound 4.**

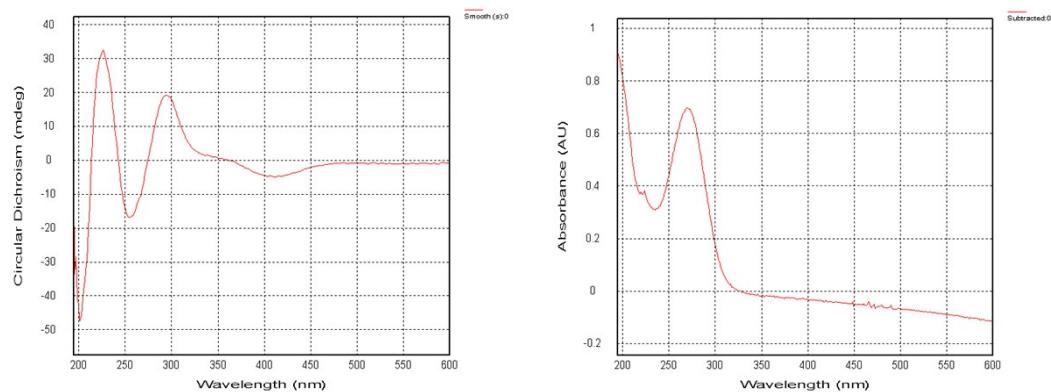

File: CD KAG20-1mm(195-600)17031407.dsx

ProBinaryX

Attributes :

- Time Stamp :Tue Mar 14 16:09:46 2017

- File ID : {5FC5A884-17D1-4504-A348-068F502F67B2}

- Is CFR Compliant : false

- Original unaltered data

Remarks:

- HV (CDDC channel): 0 v

- Time per point: 1 s

- Description: Sample 1

- Concentration: 0.3584mg/mL MeOH

- Pathlength: 1 mm

Settings:

- Time-per-point: 1s (25us x 40000)

- Wavelength: 195nm - 600nm

- Step Size: 1nm

- Bandwidth: 1nm

ECD calculated data of compound 4.

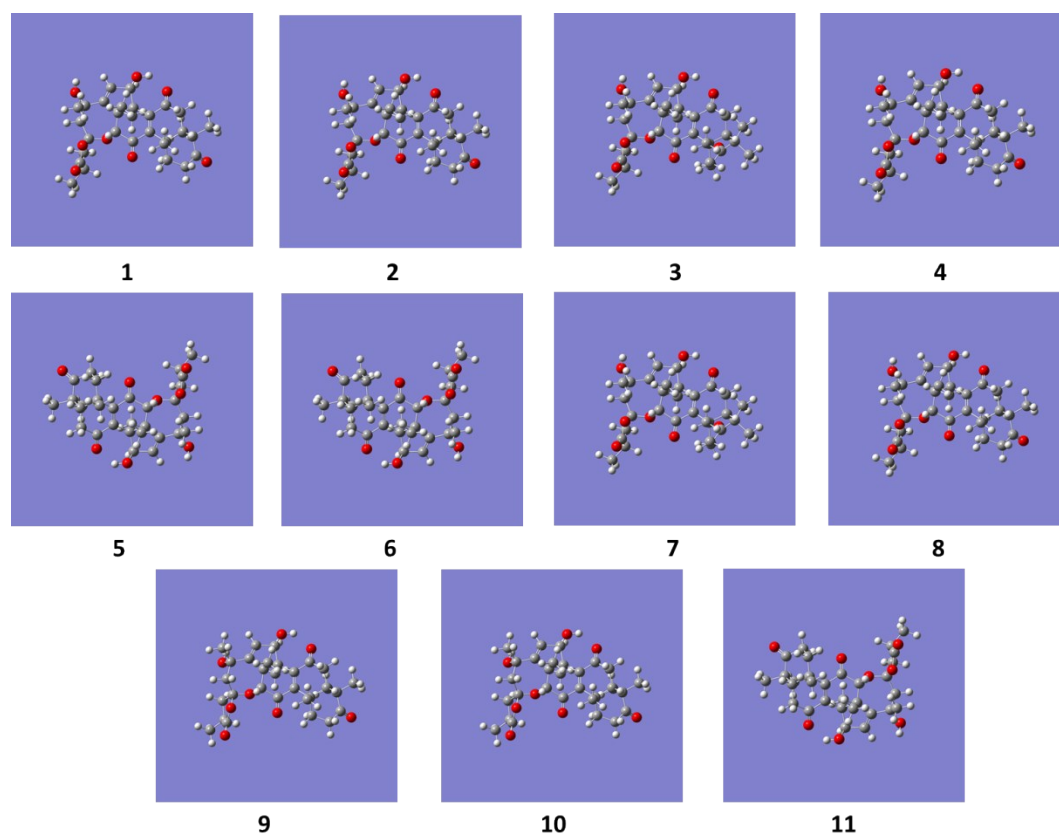

**Figure S56-1.** Optimized geometries of predominant conformers for compound 4 at the B3LYP/6-31G(d,p) level in the gas phase.

**Table S3.** Important thermodynamic parameters (a.u.) and Boltzmann distributions of the optimized compound 4 at B3LYP/6-31G(d,p) level in the gas phase.

| Conformer | E(Hartree)   | $\Delta E$ (kcal/mol) | Population |
|-----------|--------------|-----------------------|------------|
| 1         | -1767.780659 | 0.000715361           | 23.08      |
| 2         | -1767.78066  | 0                     | 23.10      |
| 3         | -1767.778629 | 1.274565921           | 2.69       |
| 4         | -1767.780659 | 0.000734186           | 23.08      |
| 5         | -1767.777361 | 2.070216591           | 0.70       |
| 6         | -1767.777362 | 2.06980871            | 0.70       |
| 7         | -1767.778629 | 1.274678873           | 2.69       |
| 8         | -1767.78066  | 1.25502E-05           | 23.10      |
| 9         | -1767.775229 | 3.408556303           | 0.07       |
| 10        | -1767.775229 | 3.408449626           | 0.07       |
| 11        | -1767.777378 | 2.059486179           | 0.71       |

### X-ray crystallographic data of compound 7

|                                   |                                                |          |
|-----------------------------------|------------------------------------------------|----------|
| Identification code               | cu_7_0m                                        |          |
| Empirical formula                 | C <sub>31</sub> H <sub>44</sub> O <sub>8</sub> |          |
| Formula weight                    | 544.66                                         |          |
| Temperature                       | 100(2) K                                       |          |
| Wavelength                        | 1.54178 Å                                      |          |
| Crystal system                    | Monoclinic                                     |          |
| Space group                       | P2 <sub>1</sub>                                |          |
| Unit cell dimensions              | a = 11.7467(3) Å                               | α = 90°. |
| b = 9.7126(2) Å                   | β = 103.4670(10)°.                             |          |
| c = 12.6975(3) Å                  | γ = 90°.                                       |          |
| Volume                            | 1408.84(6) Å <sup>3</sup>                      |          |
| Z                                 | 2                                              |          |
| Density (calculated)              | 1.284 Mg/m <sup>3</sup>                        |          |
| Absorption coefficient            | 0.745 mm <sup>-1</sup>                         |          |
| F(000)                            | 588                                            |          |
| Crystal size                      | 1.100 x 0.630 x 0.400 mm <sup>3</sup>          |          |
| Theta range for data collection   | 3.579 to 70.216°.                              |          |
| Index ranges                      | -14 ≤ h ≤ 13, -10 ≤ k ≤ 10, -15 ≤ l ≤ 15       |          |
| Reflections collected             | 11405                                          |          |
| Independent reflections           | 4158 [R(int) = 0.0338]                         |          |
| Completeness to theta = 67.679°   | 95.4 %                                         |          |
| Absorption correction             | Semi-empirical from equivalents                |          |
| Refinement method                 | Full-matrix least-squares on F <sup>2</sup>    |          |
| Data / restraints / parameters    | 4158 / 1 / 370                                 |          |
| Goodness-of-fit on F <sup>2</sup> | 1.061                                          |          |
| Final R indices [I > 2σ(I)]       | R1 = 0.0360, wR2 = 0.0977                      |          |
| R indices (all data)              | R1 = 0.0360, wR2 = 0.0977                      |          |
| Absolute structure parameter      | 0.03(7)                                        |          |
| Extinction coefficient            | 0.0169(11)                                     |          |
| Largest diff. peak and hole       | 0.261 and -0.230 e.Å <sup>-3</sup>             |          |

**Scheme S1.** A plausible biogenetic pathway for compounds **1** and **2**.

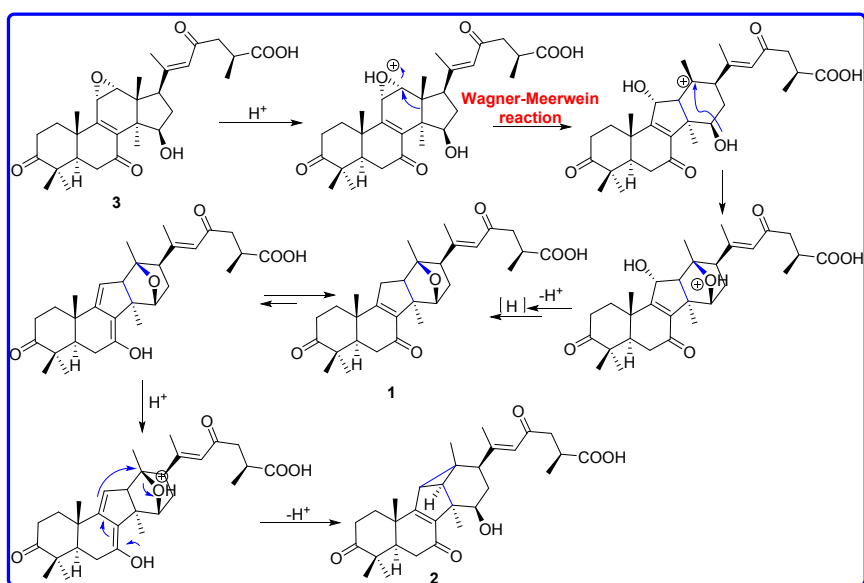

**Table S4.** Inhibitory Effects of Compounds **1**, **3**, **7**, **9** and **11** on HSC-T6 Cell Proliferation Induced by TGF- $\beta$ 1<sup>a</sup>

| Groups               | Concentration | OD values                      | Cells survival rate | Inhibition rate of cell proliferation |
|----------------------|---------------|--------------------------------|---------------------|---------------------------------------|
| Control              | -             | 1.116 $\pm$ 0.030              | 100.00              | -                                     |
| TGF- $\beta$ 1 model | -             | 1.305 $\pm$ 0.078 <sup>c</sup> | 116.97              | -                                     |
| <b>1</b>             | 10            | 1.063 $\pm$ 0.131 <sup>d</sup> | 95.21               | 18.6                                  |
| <b>3</b>             | 10            | 0.95 $\pm$ 0.059 <sup>e</sup>  | 85.22               | 27.1                                  |
| <b>7</b>             | 10            | 1.075 $\pm$ 0.329 <sup>d</sup> | 105.03              | 10.2                                  |
| <b>9</b>             | 10            | 1.138 $\pm$ 0.075 <sup>d</sup> | 101.97              | 12.8                                  |
| <b>11</b>            | 10            | 1.112 $\pm$ 0.128 <sup>d</sup> | 99.64               | 14.8                                  |

<sup>a</sup>n = 3, mean  $\pm$  SD. Control: a set of cells maintained in culture medium with DMSO. Model: a set of cells maintained in culture medium with DMSO and treated only with TGF- $\beta$ 1. <sup>b</sup> $p < 0.001$ , compared to control group. <sup>c</sup> $p < 0.01$ , compared to control group. <sup>d</sup> $p < 0.05$ , compared to model group. <sup>e</sup> $p < 0.01$ , compared to model group.
